# Supplementary material for: Cleavage of carbon suboxide to give ketenylidene and carbyne ligands at a reactive tungsten site: a theoretical mechanistic study
Source: Royal Society of Chemistry journal article supplement (doi:10.1039/c5ra19003g), 2015-12-21
Supplement: c5ra19003g1.pdf [file c5ra19003g1.pdf]

# Cleavage of Carbon Suboxide to Give Ketenylidene and Carbyne Ligands at a Reactive Tungsten Site: A Theoretical Mechanistic Study

Liang Pu,<sup>a</sup> Zhong Zhang,<sup>\*a,b</sup> Qian-shu Li,<sup>b</sup> R. Bruce King,<sup>\*c</sup>

<sup>a</sup> College of Science, Northwest A&F University, Yangling, Shanxi 712100, P. R. China

<sup>b</sup> School of Chemistry and Environment, South China Normal University, Key Laboratory of Theoretical Chemistry of Environment, Ministry of Education, Guangzhou, China 510006

<sup>c</sup> Department of Chemistry and Center for Computational Quantum Chemistry, University of Georgia, Athens, Georgia 30602, USA

## Electronic Supplementary Information

Figure S1: Reaction paths of  $C_3O_2$  binding to  $WCl_2(PMe_3)_4$

Figure S2: Reaction paths from **int3** to **P** with an extrusion of one CO or Cl ligand

Table S1: Gibbs free energies of intermediates and TS from **1** to **int3**

Table S2: Gibbs free energies of intermediates and TS from **int3** to **P**

Table S3: Natural charges of the atoms in  $C_3O_2$  molecule and its fragments

Figure S3: Geometries of **P-ph** with full  $PMePh_2$  ligands with some labeled atoms

Table S4: Bond lengths and angles for  $WCl_2(PMePh_2)_2(\eta^2_{CC-C_2}OPMePh_2)$

Tables S5-S28: Theoretical Cartesian coordinates for all complexes in the gas phase.

Reference 40: Full reference.

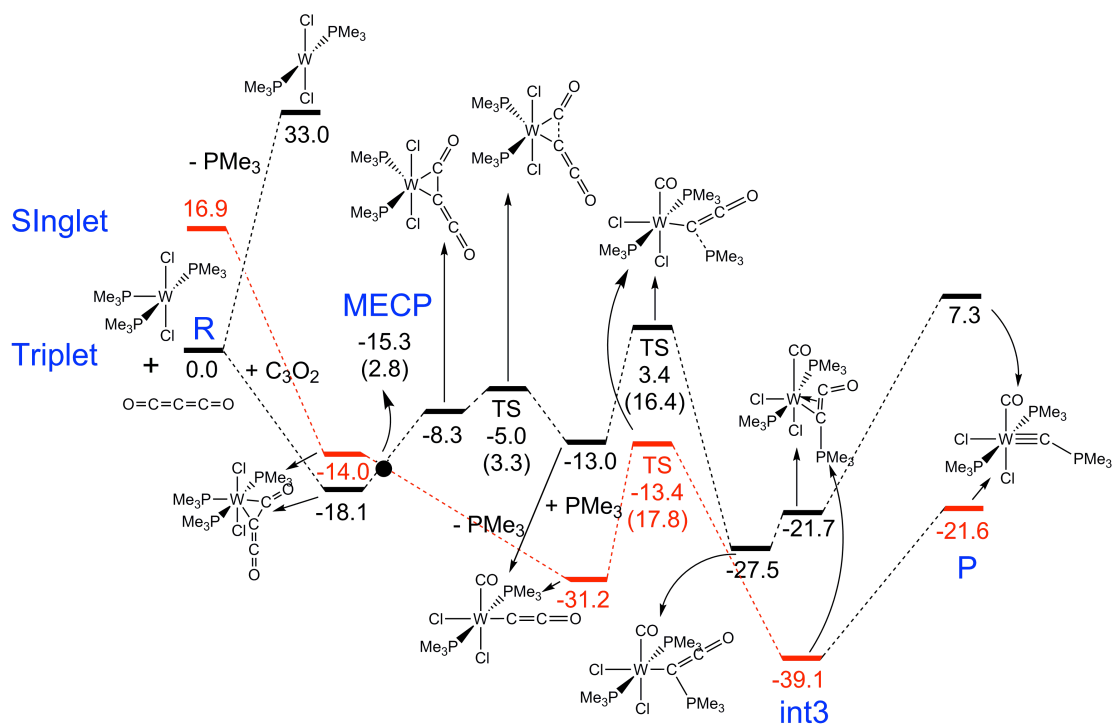

**Figure S1** The reaction paths of  $C_3O_2$  binding to  $WCl_2(PMe_3)_4$ , in singlet and triplet. The energy refers to the Gibbs free energy, in kcal/mol, relative to  $R$  plus  $C_3O_2$ .

**Table S1** The Gibbs free energies and relative energies in reactants, intermediates and transition state of the conversion from reactants to **int3**.

| species  | Gibbs free energies in gas |                          |                 | Gibbs free energies in toluene |                          |                 | $E(\text{solv-gas})^b$ |         |
|----------|----------------------------|--------------------------|-----------------|--------------------------------|--------------------------|-----------------|------------------------|---------|
|          | Singlet (S) <sup>a</sup>   | Triplet (T) <sup>a</sup> | $\Delta(T-S)^b$ | Singlet (S) <sup>a</sup>       | Triplet (T) <sup>a</sup> | $\Delta(T-S)^b$ | singlet                | triplet |
| $Cl^-$   | -460.233015                |                          |                 | -460.302675                    |                          |                 |                        |         |
| $PMe_3$  | -460.991291                |                          |                 | -460.992651                    |                          |                 |                        |         |
| $C_3O_2$ | -264.752352                |                          |                 | -264.753733                    |                          |                 |                        |         |
| CO       | -113.330599                |                          |                 | -113.330937                    |                          |                 |                        |         |
| 1        | -2832.275173               | -2832.299378             | -15.2           | -2832.281289                   | -2832.305872             | -15.4           | -3.8                   | -4.1    |
| 1-Cl     | -2371.835909               | -2371.855431             | -12.3           | -2371.871173                   | -2371.887326             | -10.1           | -22.1                  | -20.0   |
| R        | -2371.249672               | -2371.276574             | -16.9           | -2371.256246                   | -2371.284062             | -17.5           | -4.1                   | -4.7    |
| int1     | -2636.051344               | -2636.057791             | -4.0            | -2636.060569                   | -2636.065932             | -3.4            | -5.8                   | -5.1    |
| MECP     | -2636.053386               |                          |                 | -2636.059357                   |                          |                 | -3.7                   |         |
| int2     | -2175.087373               | -2175.05842              | 18.2            | -2175.094529                   | -2175.065655             | 18.1            | -4.5                   | -4.5    |
| TS1      | -2636.050268               |                          |                 | -2636.060691                   |                          |                 | -6.5                   |         |
| int3-2   |                            | -2636.072742             |                 |                                | -2636.083592             |                 |                        | -6.8    |
| int3     | -2636.091300               | -2636.063534             | 17.4            | -2636.109098                   | -2636.075016             | 21.4            | -11.2                  | -7.2    |

<sup>a</sup> in hartree;

<sup>b</sup> in kcal/mol.

**Table S2** The Gibbs free energies and relative energies in various intermediates, transition state and product of the conversion from **int3** to **P** including three dissociations of ligands, PMe<sub>3</sub>, CO and Cl<sup>-</sup>.

| Structure                     | Gibbs free energies in gas |                          |                 | Gibbs free energies in toluene |                          |                 | $\Delta G(\text{solv-gas})^b$ |         |
|-------------------------------|----------------------------|--------------------------|-----------------|--------------------------------|--------------------------|-----------------|-------------------------------|---------|
|                               | Singlet (S) <sup>a</sup>   | Triplet (T) <sup>a</sup> | $\Delta(T-S)^b$ | singlet                        | Triplet (T) <sup>a</sup> | $\Delta(T-S)^b$ | singlet                       | triplet |
| Cl <sup>-</sup>               | -460.233015                |                          |                 | -460.302675                    |                          |                 |                               |         |
| PMe <sub>3</sub>              | -460.991291                |                          |                 | -460.992651                    |                          |                 |                               |         |
| C <sub>3</sub> O <sub>2</sub> | -264.752352                |                          |                 | -264.754615                    |                          |                 |                               |         |
| CO                            | -113.330599                |                          |                 | -113.331117                    |                          |                 |                               |         |
| Extrusion of PMe <sub>3</sub> |                            |                          |                 |                                |                          |                 |                               |         |
| int3                          | -2636.091300               | -2636.063534             | 17.4            | -2636.118150                   |                          |                 | -16.8                         |         |
| int4                          | -2175.071394               | -2175.045099             | 16.5            | -2175.098772                   |                          |                 | -17.2                         |         |
| TS2                           | -2175.040326               | -2175.012964             | 17.2            | -2175.065088                   |                          |                 | -15.5                         |         |
| int5                          | -2175.045877               | -2175.019063             | 16.8            | -2175.069072                   |                          |                 | -14.6                         |         |
| int6                          | -2061.708200               | -2061.683760             | 15.3            | -2061.734879                   |                          |                 | -16.7                         |         |
| int7                          | -2061.704386               | -2061.668464             | 22.5            | -2061.730838                   |                          |                 | -16.6                         |         |
| Prod                          | -2522.732673               | -2522.686681             | 28.9            | -2522.756978                   |                          |                 | -15.3                         |         |
| Extrusion of CO               |                            |                          |                 |                                |                          |                 |                               |         |
| CO-int1                       | -2522.695012               | -2522.686651             | 5.2             | -2522.715136                   |                          |                 | -12.6                         |         |
| CO-TS                         | -2522.693424               | -2522.671888             | 13.5            | -2522.71281                    |                          |                 | -12.2                         |         |
| Extrusion of Cl <sup>-</sup>  |                            |                          |                 |                                |                          |                 |                               |         |
| Cl-int1                       | -2175.660918               |                          |                 | -2175.718002                   | -2175.686603             | 19.7            | -35.8                         |         |
| Cl-TS                         | -2175.650817               |                          |                 | -2175.700735                   |                          |                 | -31.3                         |         |
| Cl-int2                       | -2175.657138               |                          |                 | -2175.706156                   | -2175.660310             | 28.8            | -30.8                         |         |
| Cl-int3                       | -2062.311006               |                          |                 | -2062.365871                   | -2062.327188             | 24.3            | -34.4                         |         |

<sup>a</sup> in hartree;

<sup>b</sup> in kcal/mol.

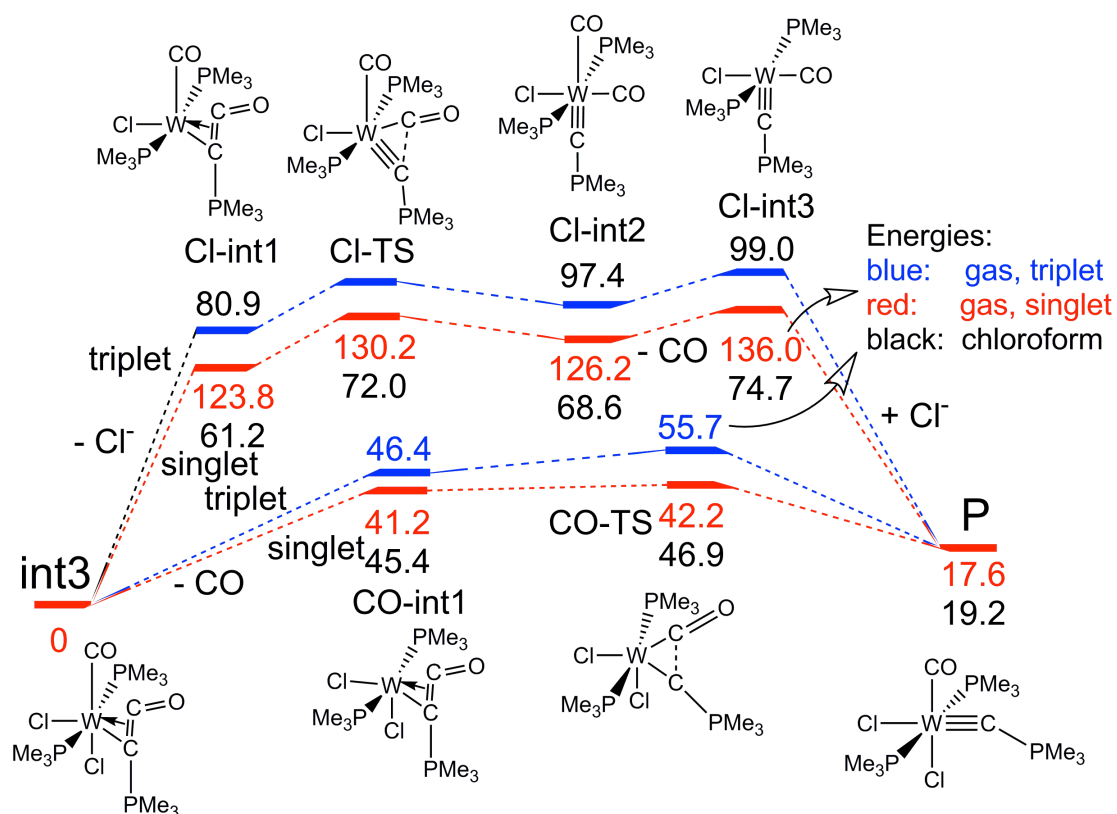

**Figure S2** The reaction paths from **int3** to **P** with an extrusion of one CO or  $Cl^-$  ligand. The energy refers to the Gibbs free energy in kcal/mol.

**Table S3** The natural charges of the atoms in  $C_3O_2$  molecule or fragments.

|         |          | O1     | C1     | C0     | C2     | O2     | Net charge |
|---------|----------|--------|--------|--------|--------|--------|------------|
| free    | $C_3O_2$ | -0.442 | 0.714  | -0.543 | 0.714  | -0.442 | 0.001      |
| complex | Int1     | -0.583 | 0.561  | -0.516 | 0.722  | -0.493 | -0.309     |
|         | MECP     | -0.573 | 0.557  | -0.491 | 0.715  | -0.489 | -0.281     |
|         | Int2     | -0.473 | 0.676  | -0.373 | 0.710  | -0.436 | 0.104      |
|         | TS1      | -0.501 | 0.629  | -0.497 | 0.712  | -0.479 | -0.136     |
|         | Int3     | -0.210 | 0.005  | -0.860 | 0.201  | -0.335 | -1.199     |
|         | Int4     | -0.511 | 0.616  | -0.778 | 0.569  | -0.591 | -0.695     |
|         | TS2      | -0.450 | 0.714  | -0.619 | 0.602  | -0.582 | -0.335     |
|         | Int5     | -0.425 | 0.744  | -0.557 | 0.534  | -0.535 | -0.239     |
|         | Int6     |        |        | -0.626 | 0.602  | -0.507 | -0.531     |
|         | Int7     |        |        | -0.652 | 0.625  | -0.518 | -0.545     |
| Prod    |          |        | -0.615 | 0.672  | -0.501 | -0.444 |            |

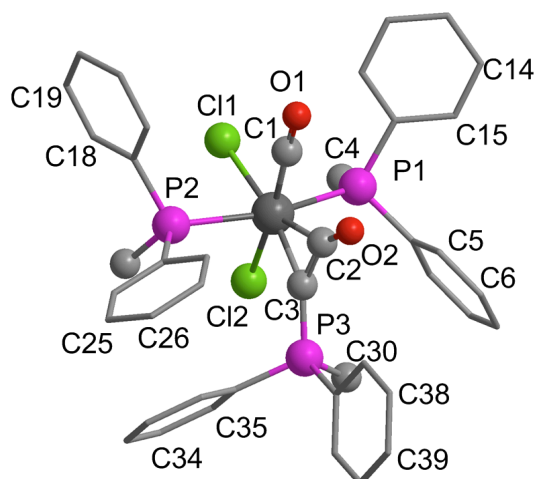

**Figure S3** Geometries of **P-ph** with full  $\text{PMePh}_2$  ligands with some labeled atoms whose data are listed in Table S2.

**Table S4** Bond lengths and angle data for **2**,  $\text{WCl}_2(\text{PMePh}_2)_2(\text{C,C}':\eta^2\text{-C}_2\text{OPMePh}_2)$ .

|           | Exp.  | This work |          | Exp.  | This work |
|-----------|-------|-----------|----------|-------|-----------|
| W-C11     | 2.474 | 2.5203    | W-C3     | 1.996 | 1.9992    |
| W-C12     | 2.575 | 2.6380    | O1-C1    | 1.175 | 1.1725    |
| W-P1      | 2.554 | 2.5547    | O2-C2    | 1.200 | 1.2265    |
| W-P2      | 2.520 | 2.5376    | C2-C3    | 1.368 | 1.3807    |
| W-C1      | 1.921 | 1.9490    | P3-C3    | 1.753 | 1.7293    |
| W-C2      | 2.146 | 2.1372    |          |       |           |
|           |       |           |          |       |           |
| Cl1-W-Cl2 | 83.2  | 82.82     | P1-W-C3  | 99.7  | 100.25    |
| Cl1-W-P1  | 84.6  | 82.60     | P2-W-C1  | 90.5  | 91.32     |
| Cl1-W-P2  | 81.9  | 79.91     | P2-W-C2  | 96.7  | 102.21    |
| Cl1-W-C1  | 85.8  | 86.35     | P2-W-C3  | 92.9  | 95.35     |
| Cl1-W-C2  | 152.8 | 155.43    | C1-W-C2  | 67.0  | 69.19     |
| Cl1-W-C3  | 168.0 | 165.58    | C1-W-C3  | 105.1 | 107.48    |
| Cl2-W-P1  | 84.4  | 82.54     | C2-W-C3  | 38.3  | 38.82     |
| Cl2-W-P2  | 90.8  | 89.66     | W-C1-O1  | 176.2 | 176.91    |
| Cl2-W-C1  | 168.7 | 168.78    | W-C2-O2  | 147.8 | 148.80    |
| Cl2-W-C2  | 124.0 | 121.46    | W-C2-C3  | 64.9  | 65.18     |
| Cl2-W-C3  | 86.1  | 83.55     | W-C3-P3  | 149.7 | 141.81    |
| P1-W-P2   | 166.2 | 161.62    | W-C3-C2  | 76.8  | 76.00     |
| P1-W-C1   | 91.8  | 93.20     | O2-C2-C3 | 147.2 | 146.01    |
| P1-W-C2   | 96.7  | 96.05     | C2-C3-P3 | 133.0 | 142.12    |

**Table S5.** The theoretical Cartesian coordinates (in Å) for the structure C<sub>3</sub>O<sub>2</sub> in gas phase.

| Center Number                                | Atomic Number | Atomic Type | Coordinates (Angstroms) |          |           |
|----------------------------------------------|---------------|-------------|-------------------------|----------|-----------|
|                                              |               |             | X                       | Y        | Z         |
| 1                                            | 6             | 0           | 0.000000                | 0.000000 | 1.278745  |
| 2                                            | 8             | 0           | 0.000000                | 0.000000 | 2.452224  |
| 3                                            | 6             | 0           | 0.000000                | 0.000000 | 0.000001  |
| 4                                            | 6             | 0           | 0.000000                | 0.000000 | -1.278746 |
| 5                                            | 8             | 0           | 0.000000                | 0.000000 | -2.452224 |
| Sum of electronic and zero-point Energies=   |               |             | -264.726215             |          |           |
| Sum of electronic and thermal Energies=      |               |             | -264.721344             |          |           |
| Sum of electronic and thermal Enthalpies=    |               |             | -264.720400             |          |           |
| Sum of electronic and thermal Free Energies= |               |             | -264.752352             |          |           |

**Table S6.** The theoretical Cartesian coordinates (in Å) for the structure Cl<sup>-</sup> in gas phase.

| Center Number                                | Atomic Number | Atomic Type | Coordinates (Angstroms) |           |          |
|----------------------------------------------|---------------|-------------|-------------------------|-----------|----------|
|                                              |               |             | X                       | Y         | Z        |
| 1                                            | 17            | 0           | -0.488844               | -2.315605 | 0.008296 |
| Sum of electronic and zero-point Energies=   |               |             | -460.217992             |           |          |
| Sum of electronic and thermal Energies=      |               |             | -460.216576             |           |          |
| Sum of electronic and thermal Enthalpies=    |               |             | -460.215632             |           |          |
| Sum of electronic and thermal Free Energies= |               |             | -460.233015             |           |          |

**Table S7.** The theoretical Cartesian coordinates (in Å) for the structure CO in gas phase.

| Center Number                                | Atomic Number | Atomic Type | Coordinates (Angstroms) |          |           |
|----------------------------------------------|---------------|-------------|-------------------------|----------|-----------|
|                                              |               |             | X                       | Y        | Z         |
| 1                                            | 6             | 0           | 0.000000                | 0.000000 | -0.654281 |
| 2                                            | 8             | 0           | 0.000000                | 0.000000 | 0.490711  |
| Sum of electronic and zero-point Energies=   |               |             | -113.311449             |          |           |
| Sum of electronic and thermal Energies=      |               |             | -113.309089             |          |           |
| Sum of electronic and thermal Enthalpies=    |               |             | -113.308144             |          |           |
| Sum of electronic and thermal Free Energies= |               |             | -113.330599             |          |           |

**Table S8.** The theoretical Cartesian coordinates (in Å) for the structure  $\text{PMe}_3$  in gas phase.

| Center<br>Number                             | Atomic<br>Number | Atomic<br>Type | Coordinates (Angstroms) |          |           |
|----------------------------------------------|------------------|----------------|-------------------------|----------|-----------|
|                                              |                  |                | X                       | Y        | Z         |
| 1                                            | 15               | 0              | -0.487374               | 2.673723 | -2.998814 |
| 2                                            | 6                | 0              | -0.838293               | 2.938904 | -4.790038 |
| 3                                            | 1                | 0              | -0.209207               | 2.281905 | -5.398195 |
| 4                                            | 1                | 0              | -1.880025               | 2.688529 | -5.011682 |
| 5                                            | 1                | 0              | -0.658325               | 3.975567 | -5.103086 |
| 6                                            | 6                | 0              | -1.460322               | 4.081202 | -2.313008 |
| 7                                            | 1                | 0              | -2.531403               | 3.888852 | -2.427569 |
| 8                                            | 1                | 0              | -1.262113               | 4.189508 | -1.242303 |
| 9                                            | 1                | 0              | -1.225430               | 5.033365 | -2.806177 |
| 10                                           | 6                | 0              | 1.189880                | 3.434478 | -2.929667 |
| 11                                           | 1                | 0              | 1.914043                | 2.797390 | -3.446602 |
| 12                                           | 1                | 0              | 1.217218                | 4.431572 | -3.388043 |
| 13                                           | 1                | 0              | 1.519782                | 3.524061 | -1.890207 |
| Sum of electronic and zero-point Energies=   |                  |                | -460.962072             |          |           |
| Sum of electronic and thermal Energies=      |                  |                | -460.955428             |          |           |
| Sum of electronic and thermal Enthalpies=    |                  |                | -460.954484             |          |           |
| Sum of electronic and thermal Free Energies= |                  |                | -460.991291             |          |           |

**Table S9.** The theoretical Cartesian coordinates (in Å) for the structure **1** in singlet in gas phase.

| Center<br>Number | Atomic<br>Number | Atomic<br>Type | Coordinates (Angstroms) |           |           |
|------------------|------------------|----------------|-------------------------|-----------|-----------|
|                  |                  |                | X                       | Y         | Z         |
| 1                | 74               | 0              | 0.000000                | 0.000000  | 0.169450  |
| 2                | 17               | 0              | 0.000000                | 0.000000  | 2.625364  |
| 3                | 15               | 0              | 0.000000                | 2.394588  | 0.374433  |
| 4                | 15               | 0              | 0.000000                | -2.394588 | 0.374433  |
| 5                | 15               | 0              | -2.371366               | 0.000000  | -0.556600 |
| 6                | 6                | 0              | 1.378443                | 3.115503  | 1.364580  |
| 7                | 1                | 0              | 2.345589                | 2.963423  | 0.872981  |
| 8                | 1                | 0              | 1.405810                | 2.602258  | 2.332401  |
| 9                | 1                | 0              | 1.247546                | 4.190773  | 1.534551  |
| 10               | 6                | 0              | -1.378443               | 3.115503  | 1.364580  |
| 11               | 1                | 0              | -2.345589               | 2.963423  | 0.872981  |
| 12               | 1                | 0              | -1.247546               | 4.190773  | 1.534551  |
| 13               | 1                | 0              | -1.405810               | 2.602258  | 2.332401  |
| 14               | 6                | 0              | 0.000000                | 3.521168  | -1.079065 |
| 15               | 1                | 0              | 0.877276                | 3.322226  | -1.701680 |
| 16               | 1                | 0              | 0.000000                | 4.577856  | -0.785311 |
| 17               | 1                | 0              | -0.877276               | 3.322226  | -1.701680 |
| 18               | 6                | 0              | -3.484179               | 0.000000  | 0.900296  |
| 19               | 1                | 0              | -4.536400               | 0.000000  | 0.594825  |
| 20               | 1                | 0              | -3.292404               | 0.881179  | 1.519057  |
| 21               | 1                | 0              | -3.292404               | -0.881179 | 1.519057  |
| 22               | 6                | 0              | -3.005643               | 1.396136  | -1.549151 |
| 23               | 1                | 0              | -4.059599               | 1.251796  | -1.812074 |
| 24               | 1                | 0              | -2.408601               | 1.460544  | -2.463184 |
| 25               | 1                | 0              | -2.905448               | 2.337889  | -1.001580 |
| 26               | 6                | 0              | -3.005643               | -1.396136 | -1.549151 |
| 27               | 1                | 0              | -4.059599               | -1.251796 | -1.812074 |
| 28               | 1                | 0              | -2.905448               | -2.337889 | -1.001580 |
| 29               | 1                | 0              | -2.408601               | -1.460544 | -2.463184 |
| 30               | 6                | 0              | 1.378443                | -3.115503 | 1.364580  |
| 31               | 1                | 0              | 1.247546                | -4.190773 | 1.534551  |
| 32               | 1                | 0              | 1.405810                | -2.602258 | 2.332401  |
| 33               | 1                | 0              | 2.345589                | -2.963423 | 0.872981  |
| 34               | 6                | 0              | 0.000000                | -3.521168 | -1.079065 |
| 35               | 1                | 0              | -0.877276               | -3.322226 | -1.701680 |
| 36               | 1                | 0              | 0.000000                | -4.577856 | -0.785311 |
| 37               | 1                | 0              | 0.877276                | -3.322226 | -1.701680 |
| 38               | 6                | 0              | -1.378443               | -3.115503 | 1.364580  |



|    |    |   |           |           |           |
|----|----|---|-----------|-----------|-----------|
| 39 | 1  | 0 | -1.405810 | -2.602258 | 2.332401  |
| 40 | 1  | 0 | -1.247546 | -4.190773 | 1.534551  |
| 41 | 1  | 0 | -2.345589 | -2.963423 | 0.872981  |
| 42 | 17 | 0 | 0.000000  | 0.000000  | -2.463029 |
| 43 | 15 | 0 | 2.371366  | 0.000000  | -0.556600 |
| 44 | 6  | 0 | 3.005643  | 1.396136  | -1.549151 |
| 45 | 1  | 0 | 4.059599  | 1.251796  | -1.812074 |
| 46 | 1  | 0 | 2.905448  | 2.337889  | -1.001580 |
| 47 | 1  | 0 | 2.408601  | 1.460544  | -2.463184 |
| 48 | 6  | 0 | 3.484179  | 0.000000  | 0.900296  |
| 49 | 1  | 0 | 4.536400  | 0.000000  | 0.594825  |
| 50 | 1  | 0 | 3.292404  | -0.881179 | 1.519057  |
| 51 | 1  | 0 | 3.292404  | 0.881179  | 1.519057  |
| 52 | 6  | 0 | 3.005643  | -1.396136 | -1.549151 |
| 53 | 1  | 0 | 2.905448  | -2.337889 | -1.001580 |
| 54 | 1  | 0 | 4.059599  | -1.251796 | -1.812074 |
| 55 | 1  | 0 | 2.408601  | -1.460544 | -2.463184 |

-----

|                                              |              |
|----------------------------------------------|--------------|
| Sum of electronic and zero-point Energies=   | -2832.213269 |
| Sum of electronic and thermal Energies=      | -2832.178416 |
| Sum of electronic and thermal Enthalpies=    | -2832.177472 |
| Sum of electronic and thermal Free Energies= | -2832.275173 |

**Table S10.** The theoretical Cartesian coordinates (in Å) for the structure **1** in triplet in gas phase.

| Center<br>Number | Atomic<br>Number | Atomic<br>Type | Coordinates (Angstroms) |           |           |
|------------------|------------------|----------------|-------------------------|-----------|-----------|
|                  |                  |                | X                       | Y         | Z         |
| 1                | 74               | 0              | 0.136926                | 0.356443  | -0.412385 |
| 2                | 17               | 0              | -0.686947               | -1.974629 | -0.009969 |
| 3                | 15               | 0              | 0.249094                | 0.365618  | 2.065558  |
| 4                | 15               | 0              | -0.218944               | -0.298899 | -2.774004 |
| 5                | 15               | 0              | 2.556464                | -0.147673 | -0.583716 |
| 6                | 6                | 0              | -1.319135               | -0.041191 | 2.931138  |
| 7                | 1                | 0              | -2.091994               | 0.707157  | 2.735163  |
| 8                | 1                | 0              | -1.671429               | -1.002490 | 2.541981  |
| 9                | 1                | 0              | -1.177998               | -0.121767 | 4.015213  |
| 10               | 6                | 0              | 1.270800                | -0.943403 | 2.850005  |
| 11               | 1                | 0              | 2.331937                | -0.832721 | 2.610143  |
| 12               | 1                | 0              | 1.159315                | -0.945443 | 3.940562  |
| 13               | 1                | 0              | 0.928922                | -1.905636 | 2.454232  |
| 14               | 6                | 0              | 0.802061                | 1.878263  | 2.935533  |
| 15               | 1                | 0              | 0.150802                | 2.715792  | 2.668901  |
| 16               | 1                | 0              | 0.797124                | 1.747887  | 4.023632  |
| 17               | 1                | 0              | 1.811733                | 2.142819  | 2.608486  |
| 18               | 6                | 0              | 3.113418                | -1.882940 | -0.405918 |
| 19               | 1                | 0              | 4.201065                | -1.976195 | -0.503092 |
| 20               | 1                | 0              | 2.803706                | -2.270916 | 0.568688  |
| 21               | 1                | 0              | 2.628765                | -2.504105 | -1.164910 |
| 22               | 6                | 0              | 3.659654                | 0.745992  | 0.581378  |
| 23               | 1                | 0              | 4.716916                | 0.531330  | 0.387236  |
| 24               | 1                | 0              | 3.483446                | 1.819125  | 0.451940  |
| 25               | 1                | 0              | 3.436749                | 0.490538  | 1.621322  |
| 26               | 6                | 0              | 3.391696                | 0.380011  | -2.132063 |
| 27               | 1                | 0              | 4.473768                | 0.209194  | -2.089932 |
| 28               | 1                | 0              | 2.990626                | -0.142885 | -3.005415 |
| 29               | 1                | 0              | 3.204024                | 1.451075  | -2.263196 |
| 30               | 6                | 0              | -1.911911               | -0.861668 | -3.208902 |
| 31               | 1                | 0              | -1.967552               | -1.231307 | -4.239341 |
| 32               | 1                | 0              | -2.175266               | -1.672820 | -2.521348 |
| 33               | 1                | 0              | -2.647667               | -0.061727 | -3.085567 |
| 34               | 6                | 0              | 0.152222                | 0.912006  | -4.095872 |
| 35               | 1                | 0              | 1.202833                | 1.210938  | -4.038611 |
| 36               | 1                | 0              | -0.055165               | 0.507352  | -5.093095 |
| 37               | 1                | 0              | -0.443504               | 1.816079  | -3.941853 |
| 38               | 6                | 0              | 0.665280                | -1.802280 | -3.347124 |

|    |    |   |           |           |           |
|----|----|---|-----------|-----------|-----------|
| 39 | 1  | 0 | 0.404308  | -2.616981 | -2.663474 |
| 40 | 1  | 0 | 0.375719  | -2.082173 | -4.366560 |
| 41 | 1  | 0 | 1.750448  | -1.669878 | -3.317475 |
| 42 | 17 | 0 | 0.955141  | 2.693027  | -0.797736 |
| 43 | 15 | 0 | -2.053948 | 1.521928  | -0.357358 |
| 44 | 6  | 0 | -2.218305 | 2.880029  | 0.868682  |
| 45 | 1  | 0 | -3.157137 | 3.431339  | 0.740286  |
| 46 | 1  | 0 | -2.175204 | 2.506351  | 1.895791  |
| 47 | 1  | 0 | -1.376683 | 3.565064  | 0.718014  |
| 48 | 6  | 0 | -3.584475 | 0.554983  | -0.082608 |
| 49 | 1  | 0 | -4.475611 | 1.192616  | -0.079709 |
| 50 | 1  | 0 | -3.686308 | -0.203232 | -0.864057 |
| 51 | 1  | 0 | -3.518898 | 0.022740  | 0.870727  |
| 52 | 6  | 0 | -2.475980 | 2.517169  | -1.842023 |
| 53 | 1  | 0 | -2.596510 | 1.890328  | -2.730098 |
| 54 | 1  | 0 | -3.396993 | 3.093623  | -1.695969 |
| 55 | 1  | 0 | -1.646153 | 3.208404  | -2.023535 |

-----  
Sum of electronic and zero-point Energies= -2832.236256  
Sum of electronic and thermal Energies= -2832.201580  
Sum of electronic and thermal Enthalpies= -2832.200636  
Sum of electronic and thermal Free Energies= -2832.299378

**Table S11.** The theoretical Cartesian coordinates (in Å) for the structure  $[\text{WCl}(\text{PMe}_3)_4]^-$  in triplet in gas phase.

| Center<br>Number | Atomic<br>Number | Atomic<br>Type | Coordinates (Angstroms) |           |           |
|------------------|------------------|----------------|-------------------------|-----------|-----------|
|                  |                  |                | X                       | Y         | Z         |
| 1                | 74               | 0              | 0.309793                | 0.857802  | -0.526819 |
| 2                | 15               | 0              | 0.078580                | -0.071589 | 1.687662  |
| 3                | 15               | 0              | -0.334704               | -0.650826 | -2.305102 |
| 4                | 15               | 0              | 2.772390                | 0.321149  | -0.678613 |
| 5                | 6                | 0              | -1.569760               | -0.553247 | 2.318163  |
| 6                | 1                | 0              | -2.210800               | 0.331018  | 2.383696  |
| 7                | 1                | 0              | -2.044116               | -1.272418 | 1.643746  |
| 8                | 1                | 0              | -1.500843               | -0.998729 | 3.315572  |
| 9                | 6                | 0              | 1.094700                | -1.498524 | 2.216570  |
| 10               | 1                | 0              | 2.155625                | -1.232895 | 2.176302  |
| 11               | 1                | 0              | 0.857687                | -1.792352 | 3.244153  |
| 12               | 1                | 0              | 0.930276                | -2.359610 | 1.561110  |
| 13               | 6                | 0              | 0.588106                | 1.222080  | 2.877793  |
| 14               | 1                | 0              | -0.040754               | 2.110176  | 2.768420  |
| 15               | 1                | 0              | 0.505637                | 0.856103  | 3.906531  |
| 16               | 1                | 0              | 1.623214                | 1.522711  | 2.693186  |
| 17               | 6                | 0              | 3.439516                | -1.379736 | -0.567144 |
| 18               | 1                | 0              | 4.532459                | -1.350452 | -0.514859 |
| 19               | 1                | 0              | 3.064097                | -1.900120 | 0.316659  |
| 20               | 1                | 0              | 3.158455                | -1.966410 | -1.443766 |
| 21               | 6                | 0              | 3.761519                | 1.184791  | 0.594047  |
| 22               | 1                | 0              | 4.834892                | 1.084216  | 0.404449  |
| 23               | 1                | 0              | 3.498010                | 2.245938  | 0.601710  |
| 24               | 1                | 0              | 3.548308                | 0.769324  | 1.585266  |
| 25               | 6                | 0              | 3.558397                | 0.915982  | -2.218012 |
| 26               | 1                | 0              | 4.647211                | 0.812332  | -2.176823 |
| 27               | 1                | 0              | 3.191317                | 0.343577  | -3.076598 |
| 28               | 1                | 0              | 3.305295                | 1.968155  | -2.374067 |
| 29               | 6                | 0              | -2.070327               | -1.201509 | -2.476115 |
| 30               | 1                | 0              | -2.182551               | -1.911659 | -3.301382 |
| 31               | 1                | 0              | -2.417628               | -1.675993 | -1.553653 |
| 32               | 1                | 0              | -2.711117               | -0.338417 | -2.679685 |
| 33               | 6                | 0              | -0.048597               | 0.218511  | -3.890230 |
| 34               | 1                | 0              | 1.003805                | 0.499951  | -3.986482 |
| 35               | 1                | 0              | -0.320712               | -0.417532 | -4.738838 |
| 36               | 1                | 0              | -0.643631               | 1.134677  | -3.934762 |
| 37               | 6                | 0              | 0.571697                | -2.219568 | -2.546345 |
| 38               | 1                | 0              | 0.572851                | -2.806942 | -1.623408 |

|                                              |    |   |              |           |           |
|----------------------------------------------|----|---|--------------|-----------|-----------|
| 39                                           | 1  | 0 | 0.129722     | -2.819385 | -3.348109 |
| 40                                           | 1  | 0 | 1.609434     | -2.001756 | -2.813899 |
| 41                                           | 17 | 0 | 1.101781     | 3.109994  | -0.828814 |
| 42                                           | 15 | 0 | -1.936124    | 2.028657  | -0.433917 |
| 43                                           | 6  | 0 | -2.030000    | 3.283076  | 0.893500  |
| 44                                           | 1  | 0 | -2.914932    | 3.917418  | 0.780789  |
| 45                                           | 1  | 0 | -2.083257    | 2.796380  | 1.873560  |
| 46                                           | 1  | 0 | -1.134133    | 3.909568  | 0.866727  |
| 47                                           | 6  | 0 | -3.525717    | 1.147986  | -0.212022 |
| 48                                           | 1  | 0 | -4.340004    | 1.871267  | -0.102711 |
| 49                                           | 1  | 0 | -3.746825    | 0.515708  | -1.074319 |
| 50                                           | 1  | 0 | -3.509654    | 0.510581  | 0.674340  |
| 51                                           | 6  | 0 | -2.290551    | 3.038968  | -1.915511 |
| 52                                           | 1  | 0 | -2.462612    | 2.393977  | -2.783324 |
| 53                                           | 1  | 0 | -3.179171    | 3.661492  | -1.769611 |
| 54                                           | 1  | 0 | -1.434061    | 3.682993  | -2.131348 |
| -----                                        |    |   |              |           |           |
| Sum of electronic and zero-point Energies=   |    |   | -2371.790685 |           |           |
| Sum of electronic and thermal Energies=      |    |   | -2371.756829 |           |           |
| Sum of electronic and thermal Enthalpies=    |    |   | -2371.755885 |           |           |
| Sum of electronic and thermal Free Energies= |    |   | -2371.855431 |           |           |

**Table S12.** The theoretical Cartesian coordinates (in Å) for the structure **R** in triplet in gas phase.

| Center<br>Number | Atomic<br>Number | Atomic<br>Type | Coordinates (Angstroms) |           |           |
|------------------|------------------|----------------|-------------------------|-----------|-----------|
|                  |                  |                | X                       | Y         | Z         |
| 1                | 74               | 0              | 0.290712                | -0.027720 | -0.382001 |
| 2                | 17               | 0              | -0.488844               | -2.315605 | 0.008296  |
| 3                | 15               | 0              | 0.300941                | 0.219190  | 2.080544  |
| 4                | 15               | 0              | -0.181695               | -0.408301 | -2.782376 |
| 5                | 15               | 0              | 2.622045                | -0.143096 | -0.580733 |
| 6                | 6                | 0              | -1.351330               | -0.008351 | 2.843416  |
| 7                | 1                | 0              | -2.044596               | 0.746825  | 2.461498  |
| 8                | 1                | 0              | -1.736321               | -0.993507 | 2.563663  |
| 9                | 1                | 0              | -1.316569               | 0.067466  | 3.936444  |
| 10               | 6                | 0              | 1.270754                | -0.999090 | 3.045177  |
| 11               | 1                | 0              | 2.340625                | -0.885919 | 2.839352  |
| 12               | 1                | 0              | 1.109506                | -0.894172 | 4.124115  |
| 13               | 1                | 0              | 0.972613                | -2.005072 | 2.733048  |
| 14               | 6                | 0              | 0.812823                | 1.823746  | 2.786772  |
| 15               | 1                | 0              | 0.199719                | 2.613795  | 2.345182  |
| 16               | 1                | 0              | 0.706777                | 1.840236  | 3.877056  |
| 17               | 1                | 0              | 1.851764                | 2.038408  | 2.522397  |
| 18               | 6                | 0              | 3.303979                | -1.824154 | -0.327119 |
| 19               | 1                | 0              | 4.394683                | -1.832329 | -0.436866 |
| 20               | 1                | 0              | 3.039489                | -2.186504 | 0.670357  |
| 21               | 1                | 0              | 2.862620                | -2.514606 | -1.051273 |
| 22               | 6                | 0              | 3.638346                | 0.867561  | 0.567046  |
| 23               | 1                | 0              | 4.713211                | 0.764336  | 0.376805  |
| 24               | 1                | 0              | 3.353609                | 1.918585  | 0.451918  |
| 25               | 1                | 0              | 3.435544                | 0.575169  | 1.603105  |
| 26               | 6                | 0              | 3.415469                | 0.348832  | -2.162091 |
| 27               | 1                | 0              | 4.508325                | 0.273153  | -2.118894 |
| 28               | 1                | 0              | 3.053471                | -0.281891 | -2.981903 |
| 29               | 1                | 0              | 3.140752                | 1.385256  | -2.383256 |
| 30               | 6                | 0              | -1.963826               | -0.640466 | -3.150215 |
| 31               | 1                | 0              | -2.144013               | -0.831886 | -4.214384 |
| 32               | 1                | 0              | -2.341585               | -1.485225 | -2.566575 |
| 33               | 1                | 0              | -2.522274               | 0.252966  | -2.855549 |
| 34               | 6                | 0              | 0.264480                | 0.906009  | -3.971251 |
| 35               | 1                | 0              | 1.350794                | 1.026852  | -4.009143 |
| 36               | 1                | 0              | -0.105460               | 0.683506  | -4.978419 |
| 37               | 1                | 0              | -0.156137               | 1.853674  | -3.624474 |
| 38               | 6                | 0              | 0.514161                | -1.919476 | -3.545739 |
| 39               | 1                | 0              | 0.217499                | -2.784189 | -2.944516 |

|                                              |    |   |          |              |           |
|----------------------------------------------|----|---|----------|--------------|-----------|
| 40                                           | 1  | 0 | 0.167865 | -2.058702    | -4.576230 |
| 41                                           | 1  | 0 | 1.608100 | -1.871876    | -3.545453 |
| 42                                           | 17 | 0 | 0.329425 | 2.397488     | -0.718177 |
| -----                                        |    |   |          |              |           |
| Sum of electronic and zero-point Energies=   |    |   |          | -2371.218124 |           |
| Sum of electronic and thermal Energies=      |    |   |          | -2371.190373 |           |
| Sum of electronic and thermal Enthalpies=    |    |   |          | -2371.189429 |           |
| Sum of electronic and thermal Free Energies= |    |   |          | -2371.276574 |           |

**Table S13.** The theoretical Cartesian coordinates (in Å) for the structure **R** in singlet in gas phase.

| Center<br>Number | Atomic<br>Number | Atomic<br>Type | Coordinates (Angstroms) |           |           |
|------------------|------------------|----------------|-------------------------|-----------|-----------|
|                  |                  |                | X                       | Y         | Z         |
| 1                | 74               | 0              | 0.446600                | 0.701685  | 0.207116  |
| 2                | 17               | 0              | 2.052903                | -1.068677 | -0.217841 |
| 3                | 15               | 0              | 0.843969                | 0.556887  | 2.614512  |
| 4                | 15               | 0              | 0.672664                | 1.147283  | -2.216672 |
| 5                | 6                | 0              | 2.432172                | 1.359363  | 3.052822  |
| 6                | 1                | 0              | 3.246336                | 0.878231  | 2.502490  |
| 7                | 1                | 0              | 2.396760                | 2.412637  | 2.759758  |
| 8                | 1                | 0              | 2.643439                | 1.293191  | 4.126152  |
| 9                | 6                | 0              | -0.316501               | 1.379134  | 3.767007  |
| 10               | 1                | 0              | -1.284665               | 0.868427  | 3.748371  |
| 11               | 1                | 0              | 0.059103                | 1.381495  | 4.796535  |
| 12               | 1                | 0              | -0.472285               | 2.411008  | 3.439016  |
| 13               | 6                | 0              | 1.050130                | -1.100911 | 3.361657  |
| 14               | 1                | 0              | 1.821561                | -1.642070 | 2.806092  |
| 15               | 1                | 0              | 1.337345                | -1.041679 | 4.417667  |
| 16               | 1                | 0              | 0.119799                | -1.670658 | 3.279769  |
| 17               | 6                | 0              | 0.761666                | -0.224333 | -3.426586 |
| 18               | 1                | 0              | 1.154133                | 0.118158  | -4.390701 |
| 19               | 1                | 0              | 1.419221                | -1.000133 | -3.022599 |
| 20               | 1                | 0              | -0.225174               | -0.664923 | -3.590183 |
| 21               | 6                | 0              | -0.441269               | 2.349115  | -3.034791 |
| 22               | 1                | 0              | -0.454896               | 3.263771  | -2.434891 |
| 23               | 1                | 0              | -0.109390               | 2.586937  | -4.051860 |
| 24               | 1                | 0              | -1.466855               | 1.969330  | -3.083366 |
| 25               | 6                | 0              | 2.291895                | 1.952721  | -2.526290 |
| 26               | 1                | 0              | 2.354231                | 2.873758  | -1.938986 |
| 27               | 1                | 0              | 3.093929                | 1.283470  | -2.199964 |
| 28               | 1                | 0              | 2.439273                | 2.193244  | -3.585683 |
| 29               | 17               | 0              | 0.232462                | 3.118539  | 0.344966  |
| 30               | 15               | 0              | -1.678700               | -0.152326 | -0.199518 |
| 31               | 6                | 0              | -3.020748               | 0.974789  | 0.366076  |
| 32               | 1                | 0              | -3.999459               | 0.481577  | 0.326542  |
| 33               | 1                | 0              | -2.829683               | 1.309830  | 1.389769  |
| 34               | 1                | 0              | -3.038628               | 1.862410  | -0.273027 |
| 35               | 6                | 0              | -2.079821               | -1.679751 | 0.751467  |
| 36               | 1                | 0              | -3.060250               | -2.089861 | 0.479784  |
| 37               | 1                | 0              | -1.316527               | -2.442989 | 0.570251  |
| 38               | 1                | 0              | -2.080380               | -1.449168 | 1.821722  |
| 39               | 6                | 0              | -2.345335               | -0.664974 | -1.835613 |



|                                              |   |   |              |           |           |
|----------------------------------------------|---|---|--------------|-----------|-----------|
| 40                                           | 1 | 0 | -3.407287    | -0.927148 | -1.764402 |
| 41                                           | 1 | 0 | -2.234475    | 0.131578  | -2.576822 |
| 42                                           | 1 | 0 | -1.796366    | -1.542649 | -2.189951 |
| -----                                        |   |   |              |           |           |
| Sum of electronic and zero-point Energies=   |   |   | -2371.193264 |           |           |
| Sum of electronic and thermal Energies=      |   |   | -2371.165947 |           |           |
| Sum of electronic and thermal Enthalpies=    |   |   | -2371.165003 |           |           |
| Sum of electronic and thermal Free Energies= |   |   | -2371.249672 |           |           |

**Table S14.** The theoretical Cartesian coordinates (in Å) for the structure **int1** in triplet in gas phase.

| Center<br>Number | Atomic<br>Number | Atomic<br>Type | Coordinates (Angstroms) |           |           |
|------------------|------------------|----------------|-------------------------|-----------|-----------|
|                  |                  |                | X                       | Y         | Z         |
| 1                | 74               | 0              | 0.225701                | 0.371929  | -0.380195 |
| 2                | 17               | 0              | -0.954662               | -1.786511 | 0.041894  |
| 3                | 15               | 0              | 0.290052                | 0.540195  | 2.194669  |
| 4                | 15               | 0              | -0.213609               | -0.255098 | -2.783779 |
| 5                | 6                | 0              | -1.221160               | -0.025970 | 3.052239  |
| 6                | 1                | 0              | -2.087491               | 0.591206  | 2.797765  |
| 7                | 1                | 0              | -1.435147               | -1.049263 | 2.728916  |
| 8                | 1                | 0              | -1.088213               | -0.004914 | 4.139032  |
| 9                | 6                | 0              | 1.537538                | -0.517258 | 2.995585  |
| 10               | 1                | 0              | 2.542338                | -0.214689 | 2.692029  |
| 11               | 1                | 0              | 1.458307                | -0.451051 | 4.085707  |
| 12               | 1                | 0              | 1.386291                | -1.555905 | 2.688026  |
| 13               | 6                | 0              | 0.631594                | 2.179639  | 2.913324  |
| 14               | 1                | 0              | -0.095895               | 2.909914  | 2.549674  |
| 15               | 1                | 0              | 0.613918                | 2.153572  | 4.008246  |
| 16               | 1                | 0              | 1.613341                | 2.517071  | 2.571609  |
| 17               | 6                | 0              | -1.887634               | -0.828953 | -3.236048 |
| 18               | 1                | 0              | -1.901630               | -1.213069 | -4.261263 |
| 19               | 1                | 0              | -2.166251               | -1.631866 | -2.545683 |
| 20               | 1                | 0              | -2.633063               | -0.032906 | -3.158255 |
| 21               | 6                | 0              | 0.230167                | 0.993730  | -4.027927 |
| 22               | 1                | 0              | 1.275929                | 1.268871  | -3.859224 |
| 23               | 1                | 0              | 0.104968                | 0.613312  | -5.047046 |
| 24               | 1                | 0              | -0.377008               | 1.893489  | -3.896960 |
| 25               | 6                | 0              | 0.769299                | -1.716526 | -3.252766 |
| 26               | 1                | 0              | 0.559937                | -2.520689 | -2.541328 |
| 27               | 1                | 0              | 0.515715                | -2.049360 | -4.264819 |
| 28               | 1                | 0              | 1.834096                | -1.477723 | -3.209005 |
| 29               | 17               | 0              | 0.726035                | 2.803169  | -0.513265 |
| 30               | 15               | 0              | -2.129989               | 1.504918  | -0.371809 |
| 31               | 6                | 0              | -2.417546               | 2.774699  | 0.912582  |
| 32               | 1                | 0              | -3.404221               | 3.233984  | 0.790037  |
| 33               | 1                | 0              | -2.357455               | 2.353861  | 1.919934  |
| 34               | 1                | 0              | -1.645292               | 3.542894  | 0.809891  |
| 35               | 6                | 0              | -3.590811               | 0.427258  | -0.211353 |
| 36               | 1                | 0              | -4.521158               | 1.005138  | -0.225147 |
| 37               | 1                | 0              | -3.604075               | -0.306635 | -1.021323 |

|    |   |   |           |           |           |
|----|---|---|-----------|-----------|-----------|
| 38 | 1 | 0 | -3.524755 | -0.139934 | 0.721391  |
| 39 | 6 | 0 | -2.484566 | 2.522085  | -1.848038 |
| 40 | 1 | 0 | -2.481279 | 1.923236  | -2.762211 |
| 41 | 1 | 0 | -3.457762 | 3.016733  | -1.759524 |
| 42 | 1 | 0 | -1.699185 | 3.278935  | -1.931345 |
| 43 | 6 | 0 | 2.111572  | 0.256003  | -1.270450 |
| 44 | 8 | 0 | 2.848125  | 0.607309  | -2.169172 |
| 45 | 6 | 0 | 2.087504  | -0.632387 | -0.153441 |
| 46 | 6 | 0 | 2.966215  | -1.461359 | 0.327677  |
| 47 | 8 | 0 | 3.770476  | -2.207631 | 0.769993  |

-----  
Sum of electronic and zero-point Energies= -2635.995321  
Sum of electronic and thermal Energies= -2635.963102  
Sum of electronic and thermal Enthalpies= -2635.962158  
Sum of electronic and thermal Free Energies= -2636.057791

**Table S15.** The theoretical Cartesian coordinates (in Å) for the structure **int1** in singlet in gas phase.

| Center<br>Number | Atomic<br>Number | Atomic<br>Type | Coordinates (Angstroms) |           |           |
|------------------|------------------|----------------|-------------------------|-----------|-----------|
|                  |                  |                | X                       | Y         | Z         |
| 1                | 74               | 0              | 0.915032                | 0.246245  | 0.045340  |
| 2                | 17               | 0              | 0.413377                | -2.204740 | 0.006124  |
| 3                | 15               | 0              | 0.994192                | 0.359201  | 2.552023  |
| 4                | 15               | 0              | 0.887520                | 1.091801  | -2.320319 |
| 5                | 6                | 0              | 1.917409                | 1.790475  | 3.185996  |
| 6                | 1                | 0              | 2.848594                | 1.909891  | 2.625553  |
| 7                | 1                | 0              | 1.325650                | 2.695818  | 3.030273  |
| 8                | 1                | 0              | 2.132549                | 1.670070  | 4.253069  |
| 9                | 6                | 0              | -0.474838               | 0.348990  | 3.635259  |
| 10               | 1                | 0              | -0.988834               | -0.612739 | 3.563154  |
| 11               | 1                | 0              | -0.189366               | 0.518144  | 4.679240  |
| 12               | 1                | 0              | -1.164023               | 1.143504  | 3.330047  |
| 13               | 6                | 0              | 1.947953                | -1.082319 | 3.130706  |
| 14               | 1                | 0              | 2.942063                | -1.062044 | 2.674936  |
| 15               | 1                | 0              | 2.050606                | -1.078888 | 4.221171  |
| 16               | 1                | 0              | 1.453199                | -2.000988 | 2.804213  |
| 17               | 6                | 0              | 0.945637                | -0.268635 | -3.533086 |
| 18               | 1                | 0              | 0.998968                | 0.107299  | -4.560575 |
| 19               | 1                | 0              | 1.826264                | -0.882472 | -3.323892 |
| 20               | 1                | 0              | 0.067584                | -0.911041 | -3.423975 |
| 21               | 6                | 0              | -0.467739               | 2.165100  | -2.892631 |
| 22               | 1                | 0              | -0.548186               | 3.013631  | -2.206611 |
| 23               | 1                | 0              | -0.267855               | 2.533338  | -3.904016 |
| 24               | 1                | 0              | -1.423403               | 1.633057  | -2.898184 |
| 25               | 6                | 0              | 2.352583                | 2.086955  | -2.737417 |
| 26               | 1                | 0              | 2.387790                | 2.963941  | -2.085761 |
| 27               | 1                | 0              | 3.258985                | 1.503720  | -2.552966 |
| 28               | 1                | 0              | 2.332408                | 2.406096  | -3.784731 |
| 29               | 17               | 0              | 0.285628                | 2.647266  | 0.420532  |
| 30               | 15               | 0              | -1.706930               | 0.032395  | -0.044696 |
| 31               | 6                | 0              | -2.737985               | 1.539255  | -0.017914 |
| 32               | 1                | 0              | -3.800782               | 1.291269  | -0.116191 |
| 33               | 1                | 0              | -2.572829               | 2.077110  | 0.919702  |
| 34               | 1                | 0              | -2.444975               | 2.217900  | -0.823093 |
| 35               | 6                | 0              | -2.548464               | -0.985761 | 1.221749  |
| 36               | 1                | 0              | -3.561937               | -1.242646 | 0.894896  |
| 37               | 1                | 0              | -1.980349               | -1.905987 | 1.383189  |

|    |   |   |           |           |           |
|----|---|---|-----------|-----------|-----------|
| 38 | 1 | 0 | -2.623045 | -0.435341 | 2.162284  |
| 39 | 6 | 0 | -2.304516 | -0.818562 | -1.552090 |
| 40 | 1 | 0 | -3.396141 | -0.910764 | -1.542995 |
| 41 | 1 | 0 | -2.011701 | -0.276759 | -2.456475 |
| 42 | 1 | 0 | -1.859198 | -1.816468 | -1.592045 |
| 43 | 6 | 0 | 2.782823  | -0.468460 | -0.364960 |
| 44 | 6 | 0 | 3.678117  | -1.381523 | -0.593233 |
| 45 | 6 | 0 | 2.795947  | 0.968039  | 0.087671  |
| 46 | 8 | 0 | 4.530290  | -2.161238 | -0.853567 |
| 47 | 8 | 0 | 3.663894  | 1.790593  | 0.277699  |

-----  
Sum of electronic and zero-point Energies= -2635.989464  
Sum of electronic and thermal Energies= -2635.957399  
Sum of electronic and thermal Enthalpies= -2635.956455  
Sum of electronic and thermal Free Energies= -2636.051344

**Table S16.** The theoretical Cartesian coordinates (in Å) for the structure **MECP** in gas phase.

| Center<br>Number | Atomic<br>Number | Atomic<br>Type | Coordinates (Angstroms) |           |           |
|------------------|------------------|----------------|-------------------------|-----------|-----------|
|                  |                  |                | X                       | Y         | Z         |
| 1                | 74               | 0              | 1.000000                | 0.321284  | 0.007419  |
| 2                | 17               | 0              | 0.741038                | -2.138636 | -0.429479 |
| 3                | 15               | 0              | 0.869862                | 0.539461  | 2.503835  |
| 4                | 15               | 0              | 0.918647                | 1.047184  | -2.396694 |
| 5                | 6                | 0              | 2.191348                | 1.585867  | 3.187750  |
| 6                | 1                | 0              | 3.168653                | 1.169621  | 2.929324  |
| 7                | 1                | 0              | 2.124119                | 2.575808  | 2.727313  |
| 8                | 1                | 0              | 2.109953                | 1.676064  | 4.276033  |
| 9                | 6                | 0              | -0.605868               | 1.268460  | 3.284443  |
| 10               | 1                | 0              | -1.499800               | 0.668255  | 3.095470  |
| 11               | 1                | 0              | -0.464293               | 1.351673  | 4.366926  |
| 12               | 1                | 0              | -0.762664               | 2.264945  | 2.862808  |
| 13               | 6                | 0              | 1.090855                | -1.059687 | 3.352203  |
| 14               | 1                | 0              | 2.011917                | -1.528975 | 2.995778  |
| 15               | 1                | 0              | 1.143728                | -0.934800 | 4.439192  |
| 16               | 1                | 0              | 0.264950                | -1.731225 | 3.101953  |
| 17               | 6                | 0              | 1.057916                | -0.358831 | -3.548361 |
| 18               | 1                | 0              | 1.146281                | -0.022574 | -4.587169 |
| 19               | 1                | 0              | 1.934315                | -0.954534 | -3.279742 |
| 20               | 1                | 0              | 0.185150                | -1.009015 | -3.442201 |
| 21               | 6                | 0              | -0.490902               | 2.018580  | -3.017445 |
| 22               | 1                | 0              | -0.580072               | 2.924047  | -2.411445 |
| 23               | 1                | 0              | -0.332634               | 2.295144  | -4.064891 |
| 24               | 1                | 0              | -1.428472               | 1.462068  | -2.940006 |
| 25               | 6                | 0              | 2.320412                | 2.116776  | -2.848510 |
| 26               | 1                | 0              | 2.319885                | 2.998786  | -2.202294 |
| 27               | 1                | 0              | 3.261495                | 1.586846  | -2.677768 |
| 28               | 1                | 0              | 2.266342                | 2.426624  | -3.897611 |
| 29               | 17               | 0              | 0.149351                | 2.677741  | 0.259528  |
| 30               | 15               | 0              | -1.582196               | -0.173157 | -0.066666 |
| 31               | 6                | 0              | -2.779546               | 1.187541  | 0.159849  |
| 32               | 1                | 0              | -3.809475               | 0.815506  | 0.123220  |
| 33               | 1                | 0              | -2.607133               | 1.688529  | 1.116133  |
| 34               | 1                | 0              | -2.635173               | 1.941911  | -0.618116 |
| 35               | 6                | 0              | -2.153381               | -1.404814 | 1.162244  |
| 36               | 1                | 0              | -3.208465               | -1.655997 | 1.007642  |
| 37               | 1                | 0              | -1.545462               | -2.307031 | 1.050953  |
| 38               | 1                | 0              | -2.034877               | -1.030736 | 2.183353  |
| 39               | 6                | 0              | -2.220287               | -0.976899 | -1.583238 |

|                                              |   |   |              |           |           |
|----------------------------------------------|---|---|--------------|-----------|-----------|
| 40                                           | 1 | 0 | -3.278942    | -1.234690 | -1.469667 |
| 41                                           | 1 | 0 | -2.118897    | -0.324930 | -2.455275 |
| 42                                           | 1 | 0 | -1.644407    | -1.888209 | -1.763165 |
| 43                                           | 6 | 0 | 2.955702     | -0.246642 | 0.055159  |
| 44                                           | 6 | 0 | 3.966338     | -1.060082 | 0.000757  |
| 45                                           | 6 | 0 | 2.784826     | 1.246261  | 0.150767  |
| 46                                           | 8 | 0 | 4.923386     | -1.757077 | -0.019956 |
| 47                                           | 8 | 0 | 3.538444     | 2.187286  | 0.243052  |
| -----                                        |   |   |              |           |           |
| Sum of electronic and zero-point Energies=   |   |   | -2635.991404 |           |           |
| Sum of electronic and thermal Energies=      |   |   | -2635.959134 |           |           |
| Sum of electronic and thermal Enthalpies=    |   |   | -2635.958190 |           |           |
| Sum of electronic and thermal Free Energies= |   |   | -2636.053386 |           |           |

**Table S17.** The theoretical Cartesian coordinates (in Å) for the structure  $\text{WCl}_2(\text{PMe}_3)_2(\eta^2\text{-C}_3\text{O}_2)$  in triplet in gas phase.

| Center<br>Number                             | Atomic<br>Number | Atomic<br>Type | Coordinates (Angstroms) |           |           |
|----------------------------------------------|------------------|----------------|-------------------------|-----------|-----------|
|                                              |                  |                | X                       | Y         | Z         |
| 1                                            | 74               | 0              | 0.344298                | 0.024157  | -0.340922 |
| 2                                            | 17               | 0              | -0.329820               | -2.266206 | 0.044457  |
| 3                                            | 15               | 0              | 0.333190                | 0.422557  | 2.175401  |
| 4                                            | 15               | 0              | -0.156476               | -0.405378 | -2.772981 |
| 5                                            | 6                | 0              | -1.350396               | 0.502329  | 2.862542  |
| 6                                            | 1                | 0              | -1.903404               | 1.304506  | 2.366698  |
| 7                                            | 1                | 0              | -1.866923               | -0.440980 | 2.664747  |
| 8                                            | 1                | 0              | -1.339903               | 0.683338  | 3.942150  |
| 9                                            | 6                | 0              | 1.159951                | -0.856682 | 3.167063  |
| 10                                           | 1                | 0              | 2.229554                | -0.866106 | 2.940955  |
| 11                                           | 1                | 0              | 1.025591                | -0.688315 | 4.240095  |
| 12                                           | 1                | 0              | 0.751248                | -1.834214 | 2.895711  |
| 13                                           | 6                | 0              | 1.100066                | 1.989181  | 2.691474  |
| 14                                           | 1                | 0              | 0.596293                | 2.814760  | 2.181993  |
| 15                                           | 1                | 0              | 1.038367                | 2.138116  | 3.774407  |
| 16                                           | 1                | 0              | 2.150931                | 1.997791  | 2.389525  |
| 17                                           | 6                | 0              | -1.866114               | -0.942801 | -3.084940 |
| 18                                           | 1                | 0              | -2.043777               | -1.135208 | -4.147813 |
| 19                                           | 1                | 0              | -2.063018               | -1.853344 | -2.512501 |
| 20                                           | 1                | 0              | -2.557778               | -0.168014 | -2.742609 |
| 21                                           | 6                | 0              | 0.097673                | 1.040515  | -3.838339 |
| 22                                           | 1                | 0              | 1.119727                | 1.403156  | -3.690275 |
| 23                                           | 1                | 0              | -0.065685               | 0.803132  | -4.894238 |
| 24                                           | 1                | 0              | -0.588528               | 1.834277  | -3.530609 |
| 25                                           | 6                | 0              | 0.872378                | -1.722576 | -3.485943 |
| 26                                           | 1                | 0              | 0.762970                | -2.624214 | -2.877252 |
| 27                                           | 1                | 0              | 0.591008                | -1.942865 | -4.520604 |
| 28                                           | 1                | 0              | 1.921543                | -1.416448 | -3.458210 |
| 29                                           | 17               | 0              | -0.916024               | 2.057931  | -0.493342 |
| 30                                           | 6                | 0              | 2.159951                | 0.490599  | -1.146931 |
| 31                                           | 8                | 0              | 2.819889                | 1.065422  | -1.992224 |
| 32                                           | 6                | 0              | 2.354660                | -0.492285 | -0.101912 |
| 33                                           | 6                | 0              | 3.363253                | -1.145177 | 0.405189  |
| 34                                           | 8                | 0              | 4.292663                | -1.704672 | 0.874996  |
| Sum of electronic and zero-point Energies=   |                  |                | -2174.992627            |           |           |
| Sum of electronic and thermal Energies=      |                  |                | -2174.967052            |           |           |
| Sum of electronic and thermal Enthalpies=    |                  |                | -2174.966107            |           |           |
| Sum of electronic and thermal Free Energies= |                  |                | -2175.050875            |           |           |



**Table S18.** The theoretical Cartesian coordinates (in Å) for the structure **int2** in singlet in gas phase.

| Center<br>Number                           | Atomic<br>Number | Atomic<br>Type | Coordinates (Angstroms) |           |           |
|--------------------------------------------|------------------|----------------|-------------------------|-----------|-----------|
|                                            |                  |                | X                       | Y         | Z         |
| 1                                          | 74               | 0              | 0.397717                | -0.377877 | -0.795168 |
| 2                                          | 15               | 0              | 2.823973                | 0.029600  | -0.255492 |
| 3                                          | 6                | 0              | 3.906737                | -1.425590 | -0.368258 |
| 4                                          | 1                | 0              | 4.935970                | -1.195131 | -0.074427 |
| 5                                          | 1                | 0              | 3.506503                | -2.199490 | 0.293432  |
| 6                                          | 1                | 0              | 3.901745                | -1.817840 | -1.388873 |
| 7                                          | 6                | 0              | 3.127787                | 0.673208  | 1.412610  |
| 8                                          | 1                | 0              | 2.726753                | -0.036038 | 2.140706  |
| 9                                          | 1                | 0              | 4.198677                | 0.819899  | 1.586531  |
| 10                                         | 1                | 0              | 2.593239                | 1.618115  | 1.532779  |
| 11                                         | 6                | 0              | 3.572170                | 1.275454  | -1.351882 |
| 12                                         | 1                | 0              | 4.606944                | 1.491910  | -1.066433 |
| 13                                         | 1                | 0              | 3.550201                | 0.926024  | -2.387159 |
| 14                                         | 1                | 0              | 2.980785                | 2.192991  | -1.290476 |
| 15                                         | 17               | 0              | 0.003118                | 1.728853  | 0.467959  |
| 16                                         | 15               | 0              | -2.018210               | -0.846476 | -0.251129 |
| 17                                         | 6                | 0              | -2.506497               | -0.419951 | 1.442563  |
| 18                                         | 1                | 0              | -3.576458               | -0.593575 | 1.596593  |
| 19                                         | 1                | 0              | -1.927437               | -1.030718 | 2.139661  |
| 20                                         | 1                | 0              | -2.262484               | 0.628754  | 1.628914  |
| 21                                         | 6                | 0              | -2.543330               | -2.576396 | -0.440378 |
| 22                                         | 1                | 0              | -3.587848               | -2.724048 | -0.146533 |
| 23                                         | 1                | 0              | -2.412142               | -2.894454 | -1.478380 |
| 24                                         | 1                | 0              | -1.900368               | -3.200411 | 0.187221  |
| 25                                         | 6                | 0              | -3.155493               | 0.117396  | -1.295801 |
| 26                                         | 1                | 0              | -4.199953               | -0.053673 | -1.014934 |
| 27                                         | 1                | 0              | -2.919041               | 1.178651  | -1.181258 |
| 28                                         | 1                | 0              | -3.017267               | -0.150302 | -2.346340 |
| 29                                         | 6                | 0              | 0.299392                | 0.178160  | -2.589328 |
| 30                                         | 17               | 0              | 0.665837                | -1.818293 | 1.294263  |
| 31                                         | 6                | 0              | 0.728513                | -2.200257 | -1.553779 |
| 32                                         | 8                | 0              | 0.917600                | -3.257242 | -2.012108 |
| 33                                         | 6                | 0              | 0.268934                | 0.411757  | -3.877884 |
| 34                                         | 8                | 0              | 0.233771                | 0.667323  | -5.025691 |
| Sum of electronic and zero-point Energies= |                  |                | -2175.030847            |           |           |
| Sum of electronic and thermal Energies=    |                  |                | -2175.005323            |           |           |

|                                              |              |
|----------------------------------------------|--------------|
| Sum of electronic and thermal Enthalpies=    | -2175.004378 |
| Sum of electronic and thermal Free Energies= | -2175.087373 |

**Table S19.** The theoretical Cartesian coordinates (in Å) for the structure **TS1** in singlet in gas phase.

| Center<br>Number | Atomic<br>Number | Atomic<br>Type | Coordinates (Angstroms) |           |           |
|------------------|------------------|----------------|-------------------------|-----------|-----------|
|                  |                  |                | X                       | Y         | Z         |
| 1                | 74               | 0              | 0.549800                | -0.189637 | -0.305392 |
| 2                | 17               | 0              | -1.103803               | -2.038730 | 0.329103  |
| 3                | 15               | 0              | 0.317551                | 0.542815  | 2.085773  |
| 4                | 15               | 0              | -0.264038               | -0.419604 | -2.681185 |
| 5                | 6                | 0              | -1.343512               | 0.374438  | 2.796557  |
| 6                | 1                | 0              | -2.030500               | 1.007567  | 2.229524  |
| 7                | 1                | 0              | -1.674534               | -0.661288 | 2.686348  |
| 8                | 1                | 0              | -1.350916               | 0.668562  | 3.851421  |
| 9                | 6                | 0              | 1.365417                | -0.439760 | 3.209066  |
| 10               | 1                | 0              | 2.417286                | -0.334129 | 2.928261  |
| 11               | 1                | 0              | 1.239137                | -0.133183 | 4.253018  |
| 12               | 1                | 0              | 1.089715                | -1.494689 | 3.106962  |
| 13               | 6                | 0              | 0.766639                | 2.269699  | 2.431880  |
| 14               | 1                | 0              | 0.160353                | 2.914175  | 1.789092  |
| 15               | 1                | 0              | 0.591508                | 2.533510  | 3.480262  |
| 16               | 1                | 0              | 1.818422                | 2.439392  | 2.185709  |
| 17               | 6                | 0              | -2.008629               | -0.892888 | -2.851129 |
| 18               | 1                | 0              | -2.291630               | -1.003084 | -3.903414 |
| 19               | 1                | 0              | -2.178727               | -1.828170 | -2.311299 |
| 20               | 1                | 0              | -2.623711               | -0.121288 | -2.380618 |
| 21               | 6                | 0              | -0.108825               | 1.072644  | -3.706893 |
| 22               | 1                | 0              | 0.946058                | 1.338156  | -3.817957 |
| 23               | 1                | 0              | -0.553294               | 0.930746  | -4.697552 |
| 24               | 1                | 0              | -0.613164               | 1.894728  | -3.191978 |
| 25               | 6                | 0              | 0.625186                | -1.701802 | -3.625865 |
| 26               | 1                | 0              | 0.450600                | -2.675613 | -3.159883 |
| 27               | 1                | 0              | 0.283700                | -1.739925 | -4.665771 |
| 28               | 1                | 0              | 1.700066                | -1.502686 | -3.608546 |
| 29               | 17               | 0              | -1.292932               | 1.598792  | -0.442385 |
| 30               | 6                | 0              | 1.790153                | 1.255032  | -0.778334 |
| 31               | 8                | 0              | 2.533043                | 2.124973  | -1.053409 |
| 32               | 6                | 0              | 3.228328                | -1.128347 | 0.008016  |
| 33               | 8                | 0              | 4.363114                | -0.817415 | 0.085311  |
| 34               | 6                | 0              | 1.959581                | -1.487273 | -0.072069 |
| 35               | 15               | 0              | 1.638594                | -3.812005 | 0.612446  |
| 36               | 6                | 0              | 1.070164                | -4.507814 | -0.972079 |
| 37               | 1                | 0              | 1.105201                | -5.603198 | -0.975003 |

|    |   |   |           |           |           |
|----|---|---|-----------|-----------|-----------|
| 38 | 1 | 0 | 0.044141  | -4.172585 | -1.150008 |
| 39 | 1 | 0 | 1.705376  | -4.133518 | -1.781087 |
| 40 | 6 | 0 | 0.672612  | -4.777412 | 1.835382  |
| 41 | 1 | 0 | 0.810326  | -5.858227 | 1.702927  |
| 42 | 1 | 0 | 0.971328  | -4.509632 | 2.852737  |
| 43 | 1 | 0 | -0.382567 | -4.520977 | 1.711991  |
| 44 | 6 | 0 | 3.309299  | -4.549035 | 0.764628  |
| 45 | 1 | 0 | 3.288819  | -5.641002 | 0.667098  |
| 46 | 1 | 0 | 3.967841  | -4.146922 | -0.011593 |
| 47 | 1 | 0 | 3.749816  | -4.297162 | 1.733793  |

-----  
Sum of electronic and zero-point Energies= -2635.984503  
Sum of electronic and thermal Energies= -2635.951365  
Sum of electronic and thermal Enthalpies= -2635.950420  
Sum of electronic and thermal Free Energies= -2636.050268

**Table S20.** The theoretical Cartesian coordinates (in Å) for the structure **int3** in singlet in gas phase.

| Center<br>Number | Atomic<br>Number | Atomic<br>Type | Coordinates (Angstroms) |           |           |
|------------------|------------------|----------------|-------------------------|-----------|-----------|
|                  |                  |                | X                       | Y         | Z         |
| 1                | 74               | 0              | 0.395225                | -0.367547 | -0.944980 |
| 2                | 15               | 0              | 2.817995                | -0.037409 | -0.374183 |
| 3                | 6                | 0              | 3.819059                | -1.550928 | -0.290637 |
| 4                | 1                | 0              | 4.852523                | -1.340118 | 0.003844  |
| 5                | 1                | 0              | 3.359965                | -2.220843 | 0.442117  |
| 6                | 1                | 0              | 3.810652                | -2.055827 | -1.260448 |
| 7                | 6                | 0              | 3.162026                | 0.807521  | 1.194381  |
| 8                | 1                | 0              | 2.765219                | 0.197118  | 2.009132  |
| 9                | 1                | 0              | 4.238162                | 0.961458  | 1.330371  |
| 10               | 1                | 0              | 2.629632                | 1.761776  | 1.208792  |
| 11               | 6                | 0              | 3.672570                | 1.005242  | -1.606885 |
| 12               | 1                | 0              | 4.738682                | 1.115759  | -1.381132 |
| 13               | 1                | 0              | 3.560285                | 0.575086  | -2.606834 |
| 14               | 1                | 0              | 3.204810                | 1.996260  | -1.596733 |
| 15               | 17               | 0              | -0.026345               | 1.886076  | 0.323192  |
| 16               | 15               | 0              | -1.989650               | -0.903894 | -0.354653 |
| 17               | 6                | 0              | -2.581535               | -0.256579 | 1.233020  |
| 18               | 1                | 0              | -3.653799               | -0.442992 | 1.358564  |
| 19               | 1                | 0              | -2.020493               | -0.744301 | 2.033622  |
| 20               | 1                | 0              | -2.363084               | 0.813460  | 1.282171  |
| 21               | 6                | 0              | -2.412415               | -2.669917 | -0.297813 |
| 22               | 1                | 0              | -3.450340               | -2.831525 | 0.012021  |
| 23               | 1                | 0              | -2.248778               | -3.124496 | -1.278502 |
| 24               | 1                | 0              | -1.739922               | -3.155931 | 0.415120  |
| 25               | 6                | 0              | -3.158779               | -0.190574 | -1.563044 |
| 26               | 1                | 0              | -4.197608               | -0.445352 | -1.327438 |
| 27               | 1                | 0              | -3.047113               | 0.899270  | -1.539047 |
| 28               | 1                | 0              | -2.923089               | -0.544765 | -2.571527 |
| 29               | 6                | 0              | 0.406679                | -0.492497 | -3.089577 |
| 30               | 8                | 0              | 0.505988                | -1.127739 | -4.129208 |
| 31               | 15               | 0              | -0.062631               | 2.240524  | -3.407701 |
| 32               | 6                | 0              | 0.194574                | 0.778720  | -2.564133 |
| 33               | 6                | 0              | -1.500640               | 2.057827  | -4.487542 |
| 34               | 1                | 0              | -1.368458               | 1.156178  | -5.091681 |
| 35               | 1                | 0              | -2.405889               | 1.944777  | -3.886557 |
| 36               | 1                | 0              | -1.613784               | 2.925510  | -5.143576 |

|    |    |   |           |           |           |
|----|----|---|-----------|-----------|-----------|
| 37 | 6  | 0 | -0.304349 | 3.728329  | -2.426281 |
| 38 | 1  | 0 | -1.153205 | 3.585129  | -1.754085 |
| 39 | 1  | 0 | 0.568653  | 3.888786  | -1.789926 |
| 40 | 1  | 0 | -0.467512 | 4.591454  | -3.080767 |
| 41 | 6  | 0 | 1.332197  | 2.538144  | -4.518444 |
| 42 | 1  | 0 | 1.499412  | 1.636990  | -5.114610 |
| 43 | 1  | 0 | 1.135058  | 3.385521  | -5.181131 |
| 44 | 1  | 0 | 2.234239  | 2.743098  | -3.937500 |
| 45 | 17 | 0 | 0.607577  | -1.469846 | 1.383431  |
| 46 | 6  | 0 | 0.718583  | -2.192548 | -1.541428 |
| 47 | 8  | 0 | 0.907309  | -3.280633 | -1.938287 |

---

|                                              |              |
|----------------------------------------------|--------------|
| Sum of electronic and zero-point Energies=   | -2636.027872 |
| Sum of electronic and thermal Energies=      | -2635.995417 |
| Sum of electronic and thermal Enthalpies=    | -2635.994473 |
| Sum of electronic and thermal Free Energies= | -2636.091300 |

**Table S21.** The theoretical Cartesian coordinates (in Å) for the structure **int4** in singlet in gas phase.

| Center<br>Number                           | Atomic<br>Number | Atomic<br>Type | Coordinates (Angstroms) |           |           |
|--------------------------------------------|------------------|----------------|-------------------------|-----------|-----------|
|                                            |                  |                | X                       | Y         | Z         |
| 1                                          | 74               | 0              | 0.040029                | -0.536766 | -0.338304 |
| 2                                          | 17               | 0              | -0.847780               | -1.221061 | 1.831720  |
| 3                                          | 15               | 0              | 0.258842                | -0.328525 | -2.810286 |
| 4                                          | 6                | 0              | -0.808851               | -1.451913 | -3.771550 |
| 5                                          | 1                | 0              | -0.686368               | -1.314101 | -4.851335 |
| 6                                          | 1                | 0              | -0.572718               | -2.490901 | -3.518417 |
| 7                                          | 1                | 0              | -1.850840               | -1.262147 | -3.499853 |
| 8                                          | 6                | 0              | -0.126880               | 1.305389  | -3.506799 |
| 9                                          | 1                | 0              | 0.560319                | 2.048246  | -3.093677 |
| 10                                         | 1                | 0              | -0.040052               | 1.301369  | -4.598246 |
| 11                                         | 1                | 0              | -1.143596               | 1.584102  | -3.218839 |
| 12                                         | 6                | 0              | 1.930286                | -0.674852 | -3.444302 |
| 13                                         | 1                | 0              | 2.238781                | -1.680729 | -3.141319 |
| 14                                         | 1                | 0              | 1.969695                | -0.597360 | -4.535532 |
| 15                                         | 1                | 0              | 2.640776                | 0.030923  | -3.004374 |
| 16                                         | 17               | 0              | -2.148444               | 0.360795  | -0.920909 |
| 17                                         | 6                | 0              | 1.096932                | 1.054174  | -0.360361 |
| 18                                         | 8                | 0              | 1.798223                | 2.000197  | -0.369826 |
| 19                                         | 6                | 0              | 2.198913                | -1.044066 | -0.356887 |
| 20                                         | 8                | 0              | 3.339049                | -0.635556 | -0.379670 |
| 21                                         | 6                | 0              | 1.318365                | -2.092816 | -0.372006 |
| 22                                         | 15               | 0              | 1.338025                | -3.687876 | 0.243513  |
| 23                                         | 6                | 0              | -0.294554               | -4.439409 | 0.166553  |
| 24                                         | 1                | 0              | -0.279320               | -5.465538 | 0.543444  |
| 25                                         | 1                | 0              | -0.975746               | -3.832512 | 0.771954  |
| 26                                         | 1                | 0              | -0.651599               | -4.440211 | -0.866739 |
| 27                                         | 6                | 0              | 1.860792                | -3.665650 | 1.965977  |
| 28                                         | 1                | 0              | 1.866337                | -4.673687 | 2.389718  |
| 29                                         | 1                | 0              | 2.862459                | -3.234294 | 2.032074  |
| 30                                         | 1                | 0              | 1.166143                | -3.028384 | 2.522037  |
| 31                                         | 6                | 0              | 2.490644                | -4.742776 | -0.661622 |
| 32                                         | 1                | 0              | 2.531424                | -5.748455 | -0.234068 |
| 33                                         | 1                | 0              | 2.184365                | -4.810918 | -1.708348 |
| 34                                         | 1                | 0              | 3.486656                | -4.294652 | -0.623550 |
| Sum of electronic and zero-point Energies= |                  |                | -2175.017097            |           |           |
| Sum of electronic and thermal Energies=    |                  |                | -2174.992650            |           |           |

|                                              |              |
|----------------------------------------------|--------------|
| Sum of electronic and thermal Enthalpies=    | -2174.991706 |
| Sum of electronic and thermal Free Energies= | -2175.071394 |



**Table S22.** The theoretical Cartesian coordinates (in Å) for the structure **TS2** in singlet in gas phase.

| Center<br>Number                           | Atomic<br>Number | Atomic<br>Type | Coordinates (Angstroms) |           |           |
|--------------------------------------------|------------------|----------------|-------------------------|-----------|-----------|
|                                            |                  |                | X                       | Y         | Z         |
| 1                                          | 74               | 0              | 0.051650                | -0.514324 | -0.405545 |
| 2                                          | 17               | 0              | -0.773499               | -0.445987 | 1.922377  |
| 3                                          | 15               | 0              | 0.236480                | -0.329131 | -2.889870 |
| 4                                          | 6                | 0              | -1.106652               | -1.141074 | -3.810046 |
| 5                                          | 1                | 0              | -0.981743               | -1.034659 | -4.892811 |
| 6                                          | 1                | 0              | -1.132448               | -2.203206 | -3.550594 |
| 7                                          | 1                | 0              | -2.055793               | -0.694073 | -3.503359 |
| 8                                          | 6                | 0              | 0.255070                | 1.357990  | -3.568078 |
| 9                                          | 1                | 0              | 1.127555                | 1.900160  | -3.192579 |
| 10                                         | 1                | 0              | 0.283732                | 1.348934  | -4.662545 |
| 11                                         | 1                | 0              | -0.643980               | 1.878321  | -3.228572 |
| 12                                         | 6                | 0              | 1.744898                | -1.082680 | -3.585658 |
| 13                                         | 1                | 0              | 1.787529                | -2.137201 | -3.295882 |
| 14                                         | 1                | 0              | 1.770532                | -1.009646 | -4.677934 |
| 15                                         | 1                | 0              | 2.629093                | -0.587576 | -3.174387 |
| 16                                         | 17               | 0              | -2.025655               | 0.700285  | -0.999316 |
| 17                                         | 6                | 0              | 1.122567                | 1.247440  | -0.162609 |
| 18                                         | 8                | 0              | 1.906905                | 2.090667  | -0.024543 |
| 19                                         | 6                | 0              | 1.924674                | -1.019272 | -0.154673 |
| 20                                         | 8                | 0              | 3.087798                | -1.258456 | -0.037789 |
| 21                                         | 6                | 0              | 0.526672                | -2.333286 | -0.417696 |
| 22                                         | 15               | 0              | 1.222197                | -3.762453 | 0.216908  |
| 23                                         | 6                | 0              | 0.004436                | -5.091058 | 0.157834  |
| 24                                         | 1                | 0              | 0.415167                | -6.014049 | 0.577366  |
| 25                                         | 1                | 0              | -0.877697               | -4.791174 | 0.726512  |
| 26                                         | 1                | 0              | -0.296462               | -5.269235 | -0.876763 |
| 27                                         | 6                | 0              | 1.646512                | -3.471947 | 1.943775  |
| 28                                         | 1                | 0              | 1.842230                | -4.409423 | 2.471156  |
| 29                                         | 1                | 0              | 2.531382                | -2.832085 | 1.983799  |
| 30                                         | 1                | 0              | 0.817097                | -2.932048 | 2.413429  |
| 31                                         | 6                | 0              | 2.700253                | -4.377572 | -0.624654 |
| 32                                         | 1                | 0              | 3.101228                | -5.254957 | -0.109007 |
| 33                                         | 1                | 0              | 2.455671                | -4.651958 | -1.653759 |
| 34                                         | 1                | 0              | 3.452907                | -3.585227 | -0.634310 |
| Sum of electronic and zero-point Energies= |                  |                | -2174.985001            |           |           |
| Sum of electronic and thermal Energies=    |                  |                | -2174.960309            |           |           |

|                                              |              |
|----------------------------------------------|--------------|
| Sum of electronic and thermal Enthalpies=    | -2174.959364 |
| Sum of electronic and thermal Free Energies= | -2175.040326 |

**Table S23.** The theoretical Cartesian coordinates (in Å) for the structure **int5** in singlet in gas phase.

| Center<br>Number                           | Atomic<br>Number | Atomic<br>Type | Coordinates (Angstroms) |           |           |
|--------------------------------------------|------------------|----------------|-------------------------|-----------|-----------|
|                                            |                  |                | X                       | Y         | Z         |
| 1                                          | 74               | 0              | -0.351106               | -0.565382 | -0.565466 |
| 2                                          | 17               | 0              | -1.200010               | -0.289208 | 1.783414  |
| 3                                          | 15               | 0              | 0.048190                | -0.321616 | -3.008881 |
| 4                                          | 6                | 0              | -1.389553               | -0.695980 | -4.059050 |
| 5                                          | 1                | 0              | -1.155773               | -0.574455 | -5.122227 |
| 6                                          | 1                | 0              | -1.711493               | -1.724352 | -3.872587 |
| 7                                          | 1                | 0              | -2.209366               | -0.029022 | -3.781086 |
| 8                                          | 6                | 0              | 0.548765                | 1.342322  | -3.550827 |
| 9                                          | 1                | 0              | 1.508600                | 1.609197  | -3.098786 |
| 10                                         | 1                | 0              | 0.639496                | 1.404221  | -4.640212 |
| 11                                         | 1                | 0              | -0.205194               | 2.054492  | -3.204495 |
| 12                                         | 6                | 0              | 1.349343                | -1.409228 | -3.680077 |
| 13                                         | 1                | 0              | 1.089099                | -2.449798 | -3.460985 |
| 14                                         | 1                | 0              | 1.468054                | -1.290769 | -4.762291 |
| 15                                         | 1                | 0              | 2.302302                | -1.194995 | -3.188301 |
| 16                                         | 17               | 0              | -2.080210               | 1.124056  | -1.199648 |
| 17                                         | 6                | 0              | 0.863832                | 1.133945  | 0.125704  |
| 18                                         | 8                | 0              | 1.574720                | 1.908280  | 0.591414  |
| 19                                         | 6                | 0              | 1.456625                | -1.276754 | -0.254057 |
| 20                                         | 8                | 0              | 2.531928                | -1.746577 | -0.116910 |
| 21                                         | 6                | 0              | -0.613523               | -2.392409 | -0.686131 |
| 22                                         | 15               | 0              | -0.308216               | -3.934099 | 0.003344  |
| 23                                         | 6                | 0              | -1.777885               | -4.978970 | -0.089925 |
| 24                                         | 1                | 0              | -1.594365               | -5.952759 | 0.372922  |
| 25                                         | 1                | 0              | -2.600186               | -4.482465 | 0.428935  |
| 26                                         | 1                | 0              | -2.065377               | -5.123417 | -1.133416 |
| 27                                         | 6                | 0              | 0.109277                | -3.755828 | 1.747279  |
| 28                                         | 1                | 0              | 0.058803                | -4.712090 | 2.276207  |
| 29                                         | 1                | 0              | 1.116542                | -3.339882 | 1.830560  |
| 30                                         | 1                | 0              | -0.581111               | -3.029015 | 2.190012  |
| 31                                         | 6                | 0              | 1.035714                | -4.845363 | -0.793687 |
| 32                                         | 1                | 0              | 1.225577                | -5.792484 | -0.279972 |
| 33                                         | 1                | 0              | 0.778706                | -5.050503 | -1.835739 |
| 34                                         | 1                | 0              | 1.943261                | -4.235909 | -0.768384 |
| Sum of electronic and zero-point Energies= |                  |                | -2174.988269            |           |           |
| Sum of electronic and thermal Energies=    |                  |                | -2174.962583            |           |           |

|                                              |              |
|----------------------------------------------|--------------|
| Sum of electronic and thermal Enthalpies=    | -2174.961639 |
| Sum of electronic and thermal Free Energies= | -2175.045877 |

**Table S24.** The theoretical Cartesian coordinates (in Å) for the structure **int6** in singlet in gas phase.

| Center<br>Number                             | Atomic<br>Number | Atomic<br>Type | Coordinates (Angstroms) |           |           |
|----------------------------------------------|------------------|----------------|-------------------------|-----------|-----------|
|                                              |                  |                | X                       | Y         | Z         |
| 1                                            | 74               | 0              | 0.050916                | -0.756695 | -0.516971 |
| 2                                            | 17               | 0              | -0.124867               | -0.278954 | 1.867772  |
| 3                                            | 15               | 0              | 0.120697                | -0.334260 | -2.959747 |
| 4                                            | 6                | 0              | -1.432522               | -0.672814 | -3.849578 |
| 5                                            | 1                | 0              | -1.357833               | -0.426444 | -4.914427 |
| 6                                            | 1                | 0              | -1.684002               | -1.731608 | -3.739345 |
| 7                                            | 1                | 0              | -2.228245               | -0.084076 | -3.386395 |
| 8                                            | 6                | 0              | 0.489404                | 1.388711  | -3.418808 |
| 9                                            | 1                | 0              | 1.469283                | 1.682728  | -3.032650 |
| 10                                           | 1                | 0              | 0.482181                | 1.521972  | -4.505737 |
| 11                                           | 1                | 0              | -0.267020               | 2.035667  | -2.966219 |
| 12                                           | 6                | 0              | 1.351920                | -1.305267 | -3.890546 |
| 13                                           | 1                | 0              | 1.160898                | -2.370651 | -3.729608 |
| 14                                           | 1                | 0              | 1.315388                | -1.092613 | -4.964577 |
| 15                                           | 1                | 0              | 2.355537                | -1.088101 | -3.514983 |
| 16                                           | 17               | 0              | -1.816888               | 0.869864  | -0.751441 |
| 17                                           | 6                | 0              | 1.972958                | -1.139165 | -0.451699 |
| 18                                           | 8                | 0              | 3.123968                | -1.391185 | -0.462633 |
| 19                                           | 6                | 0              | -0.223573               | -2.533731 | -0.733988 |
| 20                                           | 15               | 0              | -0.321675               | -4.055417 | 0.030605  |
| 21                                           | 6                | 0              | -1.810710               | -4.984118 | -0.401644 |
| 22                                           | 1                | 0              | -1.832934               | -5.948496 | 0.114366  |
| 23                                           | 1                | 0              | -2.691639               | -4.406224 | -0.115074 |
| 24                                           | 1                | 0              | -1.843932               | -5.151550 | -1.480170 |
| 25                                           | 6                | 0              | -0.304270               | -3.908720 | 1.825673  |
| 26                                           | 1                | 0              | -0.408037               | -4.888148 | 2.302288  |
| 27                                           | 1                | 0              | 0.630135                | -3.433711 | 2.134942  |
| 28                                           | 1                | 0              | -1.115270               | -3.247252 | 2.140165  |
| 29                                           | 6                | 0              | 1.088937                | -5.083580 | -0.434679 |
| 30                                           | 1                | 0              | 1.055487                | -6.047944 | 0.080403  |
| 31                                           | 1                | 0              | 1.084694                | -5.250510 | -1.514026 |
| 32                                           | 1                | 0              | 2.012447                | -4.563729 | -0.168280 |
| Sum of electronic and zero-point Energies=   |                  |                | -2061.653092            |           |           |
| Sum of electronic and thermal Energies=      |                  |                | -2061.629871            |           |           |
| Sum of electronic and thermal Enthalpies=    |                  |                | -2061.628926            |           |           |
| Sum of electronic and thermal Free Energies= |                  |                | -2061.708200            |           |           |

**Table S25.** The theoretical Cartesian coordinates (in Å) for the structure **int7** in singlet in gas phase.

| Center<br>Number                           | Atomic<br>Number | Atomic<br>Type | Coordinates (Angstroms) |           |           |
|--------------------------------------------|------------------|----------------|-------------------------|-----------|-----------|
|                                            |                  |                | X                       | Y         | Z         |
| 1                                          | 74               | 0              | 0.372207                | 0.122516  | -0.524893 |
| 2                                          | 15               | 0              | 2.809562                | 0.117186  | -0.302164 |
| 3                                          | 6                | 0              | 3.726647                | -1.394049 | -0.741257 |
| 4                                          | 1                | 0              | 4.793976                | -1.296374 | -0.514249 |
| 5                                          | 1                | 0              | 3.304200                | -2.231048 | -0.179938 |
| 6                                          | 1                | 0              | 3.601491                | -1.603086 | -1.807464 |
| 7                                          | 6                | 0              | 3.357185                | 0.426513  | 1.408201  |
| 8                                          | 1                | 0              | 2.949363                | -0.362309 | 2.046157  |
| 9                                          | 1                | 0              | 4.450189                | 0.431317  | 1.483985  |
| 10                                         | 1                | 0              | 2.966648                | 1.384090  | 1.762317  |
| 11                                         | 6                | 0              | 3.677204                | 1.399374  | -1.266538 |
| 12                                         | 1                | 0              | 4.750151                | 1.411158  | -1.046132 |
| 13                                         | 1                | 0              | 3.538630                | 1.193519  | -2.332540 |
| 14                                         | 1                | 0              | 3.249856                | 2.381588  | -1.047717 |
| 15                                         | 17               | 0              | -1.354032               | 0.739664  | 0.991171  |
| 16                                         | 15               | 0              | 0.065249                | 2.134293  | -3.353233 |
| 17                                         | 6                | 0              | 0.324467                | 1.391974  | -1.840339 |
| 18                                         | 6                | 0              | -1.231326               | 1.272248  | -4.269924 |
| 19                                         | 1                | 0              | -0.928763               | 0.233324  | -4.423127 |
| 20                                         | 1                | 0              | -2.148038               | 1.274273  | -3.676989 |
| 21                                         | 1                | 0              | -1.417951               | 1.745405  | -5.238666 |
| 22                                         | 6                | 0              | -0.464510               | 3.853267  | -3.175610 |
| 23                                         | 1                | 0              | -1.366650               | 3.888106  | -2.562166 |
| 24                                         | 1                | 0              | 0.315503                | 4.425441  | -2.669030 |
| 25                                         | 1                | 0              | -0.668345               | 4.305108  | -4.150701 |
| 26                                         | 6                | 0              | 1.507084                | 2.164188  | -4.450879 |
| 27                                         | 1                | 0              | 1.855710                | 1.140117  | -4.611979 |
| 28                                         | 1                | 0              | 1.259886                | 2.612450  | -5.418163 |
| 29                                         | 1                | 0              | 2.313734                | 2.738158  | -3.988237 |
| 30                                         | 17               | 0              | 0.748343                | -1.959699 | 0.884658  |
| 31                                         | 6                | 0              | 0.666207                | -1.128024 | -2.011832 |
| 32                                         | 8                | 0              | 0.762724                | -1.832592 | -2.948982 |
| Sum of electronic and zero-point Energies= |                  |                | -2061.651224            |           |           |
| Sum of electronic and thermal Energies=    |                  |                | -2061.628501            |           |           |

|                                              |              |
|----------------------------------------------|--------------|
| Sum of electronic and thermal Enthalpies=    | -2061.627557 |
| Sum of electronic and thermal Free Energies= | -2061.704386 |

**Table S26.** The theoretical Cartesian coordinates (in Å) for the structure **P** in singlet in gas phase.

| Center<br>Number | Atomic<br>Number | Atomic<br>Type | Coordinates (Angstroms) |           |           |
|------------------|------------------|----------------|-------------------------|-----------|-----------|
|                  |                  |                | X                       | Y         | Z         |
| 1                | 74               | 0              | 0.364531                | -0.213907 | -0.834126 |
| 2                | 15               | 0              | 2.810495                | 0.090396  | -0.348777 |
| 3                | 6                | 0              | 3.848398                | -1.394541 | -0.526533 |
| 4                | 1                | 0              | 4.885815                | -1.210781 | -0.225693 |
| 5                | 1                | 0              | 3.418280                | -2.177112 | 0.105735  |
| 6                | 1                | 0              | 3.827066                | -1.747220 | -1.561602 |
| 7                | 6                | 0              | 3.196424                | 0.656534  | 1.334294  |
| 8                | 1                | 0              | 2.800184                | -0.079153 | 2.038868  |
| 9                | 1                | 0              | 4.277012                | 0.768598  | 1.476656  |
| 10               | 1                | 0              | 2.683486                | 1.603020  | 1.522069  |
| 11               | 6                | 0              | 3.640838                | 1.331065  | -1.401811 |
| 12               | 1                | 0              | 4.696260                | 1.457501  | -1.135761 |
| 13               | 1                | 0              | 3.570918                | 1.026428  | -2.450893 |
| 14               | 1                | 0              | 3.127106                | 2.291135  | -1.281110 |
| 15               | 17               | 0              | 0.040715                | 1.841302  | 0.676678  |
| 16               | 15               | 0              | -2.021598               | -0.736623 | -0.238979 |
| 17               | 6                | 0              | -2.491164               | -0.338799 | 1.470096  |
| 18               | 1                | 0              | -3.553138               | -0.540294 | 1.648851  |
| 19               | 1                | 0              | -1.877995               | -0.946481 | 2.140668  |
| 20               | 1                | 0              | -2.257017               | 0.710533  | 1.669648  |
| 21               | 6                | 0              | -2.519960               | -2.479268 | -0.413269 |
| 22               | 1                | 0              | -3.544953               | -2.655086 | -0.068085 |
| 23               | 1                | 0              | -2.430062               | -2.791812 | -1.457672 |
| 24               | 1                | 0              | -1.827815               | -3.084664 | 0.179751  |
| 25               | 6                | 0              | -3.251531               | 0.172581  | -1.237135 |
| 26               | 1                | 0              | -4.279480               | -0.041252 | -0.924105 |
| 27               | 1                | 0              | -3.061357               | 1.245436  | -1.130043 |
| 28               | 1                | 0              | -3.135541               | -0.098384 | -2.291190 |
| 29               | 15               | 0              | -0.037071               | 1.944880  | -3.534926 |
| 30               | 6                | 0              | 0.175449                | 0.700046  | -2.401453 |
| 31               | 6                | 0              | -1.354103               | 1.664557  | -4.747622 |
| 32               | 1                | 0              | -1.134846               | 0.768553  | -5.332176 |
| 33               | 1                | 0              | -2.302457               | 1.513978  | -4.226582 |
| 34               | 1                | 0              | -1.451382               | 2.519738  | -5.423636 |
| 35               | 6                | 0              | -0.457242               | 3.475394  | -2.671007 |
| 36               | 1                | 0              | -1.430046               | 3.361929  | -2.187337 |
| 37               | 1                | 0              | 0.273619                | 3.642701  | -1.875050 |
| 38               | 1                | 0              | -0.480652               | 4.327711  | -3.356993 |



|    |    |   |          |           |           |
|----|----|---|----------|-----------|-----------|
| 39 | 6  | 0 | 1.437566 | 2.316121  | -4.520714 |
| 40 | 1  | 0 | 1.761231 | 1.419617  | -5.054245 |
| 41 | 1  | 0 | 1.235017 | 3.112021  | -5.243981 |
| 42 | 1  | 0 | 2.245613 | 2.634534  | -3.857644 |
| 43 | 17 | 0 | 0.685484 | -1.791915 | 1.237489  |
| 44 | 6  | 0 | 0.637318 | -1.934914 | -1.792335 |
| 45 | 8  | 0 | 0.795576 | -2.940119 | -2.376045 |

-----  
Sum of electronic and zero-point Energies= -2522.670874  
Sum of electronic and thermal Energies= -2522.639986  
Sum of electronic and thermal Enthalpies= -2522.639042  
Sum of electronic and thermal Free Energies= -2522.732673

**Table S27.** The theoretical Cartesian coordinates (in Å) for the structure **int3-ph** in singlet in gas phase.

| Center<br>Number | Atomic<br>Number | Atomic<br>Type | Coordinates (Angstroms) |           |           |
|------------------|------------------|----------------|-------------------------|-----------|-----------|
|                  |                  |                | X                       | Y         | Z         |
| 1                | 74               | 0              | 0.250263                | -0.134811 | 0.199669  |
| 2                | 17               | 0              | -1.080138               | -2.192779 | -0.777026 |
| 3                | 15               | 0              | 0.013764                | 0.728528  | -2.193110 |
| 4                | 15               | 0              | -0.319942               | -0.901278 | 2.550529  |
| 5                | 6                | 0              | -1.602683               | 0.436509  | -2.965312 |
| 6                | 1                | 0              | -2.340787               | 1.012000  | -2.402068 |
| 7                | 1                | 0              | -1.860563               | -0.621219 | -2.863528 |
| 8                | 1                | 0              | -1.607051               | 0.756323  | -4.012360 |
| 9                | 6                | 0              | -1.487962               | -2.290897 | 2.588614  |
| 10               | 1                | 0              | -2.305187               | -2.061682 | 1.898816  |
| 11               | 1                | 0              | -1.882659               | -2.488318 | 3.590828  |
| 12               | 1                | 0              | -0.984481               | -3.180656 | 2.194830  |
| 13               | 17               | 0              | -2.060536               | 0.843456  | 0.434638  |
| 14               | 6                | 0              | 0.906598                | 1.574437  | 0.867807  |
| 15               | 8                | 0              | 1.360197                | 2.579494  | 1.266485  |
| 16               | 6                | 0              | 2.386892                | -0.105086 | 0.239596  |
| 17               | 8                | 0              | 3.424935                | 0.535484  | 0.367680  |
| 18               | 6                | 0              | 1.829111                | -1.342704 | -0.012495 |
| 19               | 15               | 0              | 2.248493                | -2.979317 | -0.381602 |
| 20               | 6                | 0              | 1.850166                | -3.418386 | -2.081622 |
| 21               | 1                | 0              | 2.137593                | -4.456974 | -2.272742 |
| 22               | 1                | 0              | 2.414084                | -2.759493 | -2.749903 |
| 23               | 1                | 0              | 0.779110                | -3.269141 | -2.246605 |
| 24               | 6                | 0              | 0.287396                | 2.511994  | -2.459560 |
| 25               | 6                | 0              | -0.299867               | 3.405557  | -1.551522 |
| 26               | 6                | 0              | 1.006533                | 3.016061  | -3.551848 |
| 27               | 6                | 0              | -0.167671               | 4.780638  | -1.735389 |
| 28               | 1                | 0              | -0.860689               | 3.018202  | -0.700072 |
| 29               | 6                | 0              | 1.144512                | 4.393747  | -3.726556 |
| 30               | 1                | 0              | 1.464994                | 2.333523  | -4.266414 |
| 31               | 6                | 0              | 0.557177                | 5.278224  | -2.820215 |
| 32               | 1                | 0              | -0.623920               | 5.463105  | -1.022869 |
| 33               | 1                | 0              | 1.710615                | 4.774842  | -4.573550 |
| 34               | 1                | 0              | 0.667439                | 6.351547  | -2.956974 |
| 35               | 6                | 0              | 1.224601                | -0.080140 | -3.286206 |
| 36               | 6                | 0              | 2.594834                | 0.103529  | -3.029775 |
| 37               | 6                | 0              | 0.837017                | -0.908652 | -4.346497 |

|    |   |   |           |           |           |
|----|---|---|-----------|-----------|-----------|
| 38 | 6 | 0 | 3.552521  | -0.524021 | -3.823796 |
| 39 | 1 | 0 | 2.913013  | 0.746004  | -2.208208 |
| 40 | 6 | 0 | 1.798868  | -1.534985 | -5.143997 |
| 41 | 1 | 0 | -0.218244 | -1.072986 | -4.554441 |
| 42 | 6 | 0 | 3.157016  | -1.344191 | -4.886832 |
| 43 | 1 | 0 | 4.608138  | -0.371774 | -3.610873 |
| 44 | 1 | 0 | 1.483449  | -2.172057 | -5.966922 |
| 45 | 1 | 0 | 3.904866  | -1.830452 | -5.508829 |
| 46 | 6 | 0 | 1.094260  | -1.437067 | 3.576981  |
| 47 | 6 | 0 | 2.354801  | -0.850591 | 3.392342  |
| 48 | 6 | 0 | 0.933241  | -2.392533 | 4.590119  |
| 49 | 6 | 0 | 3.437558  | -1.232622 | 4.185439  |
| 50 | 1 | 0 | 2.496502  | -0.084477 | 2.632191  |
| 51 | 6 | 0 | 2.014168  | -2.770855 | 5.386095  |
| 52 | 1 | 0 | -0.039361 | -2.853394 | 4.755682  |
| 53 | 6 | 0 | 3.271924  | -2.198340 | 5.180650  |
| 54 | 1 | 0 | 4.408189  | -0.770567 | 4.022541  |
| 55 | 1 | 0 | 1.873425  | -3.514014 | 6.168132  |
| 56 | 1 | 0 | 4.115062  | -2.496518 | 5.799304  |
| 57 | 6 | 0 | -1.084876 | 0.374353  | 3.602149  |
| 58 | 6 | 0 | -0.279599 | 1.387676  | 4.138052  |
| 59 | 6 | 0 | -2.464436 | 0.397057  | 3.838302  |
| 60 | 6 | 0 | -0.842970 | 2.397800  | 4.914377  |
| 61 | 1 | 0 | 0.793169  | 1.390479  | 3.945546  |
| 62 | 6 | 0 | -3.026654 | 1.408954  | 4.616528  |
| 63 | 1 | 0 | -3.107132 | -0.362835 | 3.398607  |
| 64 | 6 | 0 | -2.218235 | 2.408651  | 5.158512  |
| 65 | 1 | 0 | -0.207463 | 3.178836  | 5.324500  |
| 66 | 1 | 0 | -4.099923 | 1.419620  | 4.791031  |
| 67 | 1 | 0 | -2.659070 | 3.198175  | 5.762814  |
| 68 | 6 | 0 | 4.023066  | -3.268820 | -0.193961 |
| 69 | 6 | 0 | 4.918133  | -2.208998 | 0.002853  |
| 70 | 6 | 0 | 4.499839  | -4.586274 | -0.288147 |
| 71 | 6 | 0 | 6.285660  | -2.480544 | 0.102936  |
| 72 | 1 | 0 | 4.556318  | -1.182405 | 0.087250  |
| 73 | 6 | 0 | 5.864028  | -4.844807 | -0.191285 |
| 74 | 1 | 0 | 3.799777  | -5.411945 | -0.422055 |
| 75 | 6 | 0 | 6.759063  | -3.788447 | 0.004654  |
| 76 | 1 | 0 | 6.981113  | -1.660086 | 0.261112  |
| 77 | 1 | 0 | 6.228955  | -5.866286 | -0.262399 |
| 78 | 1 | 0 | 7.824908  | -3.989397 | 0.084147  |
| 79 | 6 | 0 | 1.466844  | -4.183919 | 0.712815  |
| 80 | 6 | 0 | 1.981504  | -4.339043 | 2.008157  |
| 81 | 6 | 0 | 0.378816  | -4.963196 | 0.294180  |

|                                              |   |   |              |           |           |
|----------------------------------------------|---|---|--------------|-----------|-----------|
| 82                                           | 6 | 0 | 1.418871     | -5.276305 | 2.873201  |
| 83                                           | 1 | 0 | 2.826576     | -3.734284 | 2.340448  |
| 84                                           | 6 | 0 | -0.177002    | -5.899599 | 1.164167  |
| 85                                           | 1 | 0 | -0.046319    | -4.819072 | -0.695558 |
| 86                                           | 6 | 0 | 0.341483     | -6.058200 | 2.452200  |
| 87                                           | 1 | 0 | 1.825409     | -5.392151 | 3.874905  |
| 88                                           | 1 | 0 | -1.021017    | -6.500694 | 0.836733  |
| 89                                           | 1 | 0 | -0.094340    | -6.791114 | 3.126851  |
| -----                                        |   |   |              |           |           |
| Sum of electronic and zero-point Energies=   |   |   | -3786.093578 |           |           |
| Sum of electronic and thermal Energies=      |   |   | -3786.043085 |           |           |
| Sum of electronic and thermal Enthalpies=    |   |   | -3786.042141 |           |           |
| Sum of electronic and thermal Free Energies= |   |   | -3786.179633 |           |           |

**Table S28.** The theoretical Cartesian coordinates (in Å) for the structure **P-ph** in singlet in gas phase.

| Center<br>Number | Atomic<br>Number | Atomic<br>Type | Coordinates (Angstroms) |           |           |
|------------------|------------------|----------------|-------------------------|-----------|-----------|
|                  |                  |                | X                       | Y         | Z         |
| 1                | 74               | 0              | 0.055827                | -0.241339 | 0.196927  |
| 2                | 17               | 0              | -1.422123               | -2.189202 | -0.767677 |
| 3                | 15               | 0              | 0.096859                | 0.561364  | -2.209303 |
| 4                | 15               | 0              | -0.581612               | -0.941979 | 2.526231  |
| 5                | 6                | 0              | -1.434116               | 0.286445  | -3.151518 |
| 6                | 1                | 0              | -2.220991               | 0.860399  | -2.654605 |
| 7                | 1                | 0              | -1.711007               | -0.770610 | -3.087335 |
| 8                | 1                | 0              | -1.338355               | 0.616203  | -4.191684 |
| 9                | 6                | 0              | -1.909940               | -2.181848 | 2.616406  |
| 10               | 1                | 0              | -2.713004               | -1.855588 | 1.949624  |
| 11               | 1                | 0              | -2.297810               | -2.320116 | 3.631082  |
| 12               | 1                | 0              | -1.540156               | -3.129694 | 2.215334  |
| 13               | 17               | 0              | -2.090717               | 1.130206  | 0.300980  |
| 14               | 6                | 0              | 1.143352                | 1.271691  | 0.880132  |
| 15               | 8                | 0              | 1.857393                | 2.115902  | 1.277876  |
| 16               | 6                | 0              | 1.517627                | -1.319752 | 0.131619  |
| 17               | 15               | 0              | 2.431860                | -2.747317 | -0.112039 |
| 18               | 6                | 0              | 1.973044                | -3.469963 | -1.700799 |
| 19               | 1                | 0              | 2.330038                | -4.500997 | -1.778317 |
| 20               | 1                | 0              | 2.378458                | -2.866035 | -2.517462 |
| 21               | 1                | 0              | 0.876183                | -3.445458 | -1.750011 |
| 22               | 6                | 0              | 0.460197                | 2.325669  | -2.529243 |
| 23               | 6                | 0              | 0.107728                | 3.293260  | -1.579091 |
| 24               | 6                | 0              | 1.041791                | 2.734173  | -3.739548 |
| 25               | 6                | 0              | 0.339286                | 4.645367  | -1.835337 |
| 26               | 1                | 0              | -0.363663               | 2.982999  | -0.646672 |
| 27               | 6                | 0              | 1.276319                | 4.085250  | -3.990777 |
| 28               | 1                | 0              | 1.322676                | 1.989981  | -4.485624 |
| 29               | 6                | 0              | 0.925311                | 5.044367  | -3.037689 |
| 30               | 1                | 0              | 0.061178                | 5.387092  | -1.090365 |
| 31               | 1                | 0              | 1.732936                | 4.389654  | -4.930007 |
| 32               | 1                | 0              | 1.110107                | 6.098499  | -3.232338 |
| 33               | 6                | 0              | 1.402403                | -0.274909 | -3.170895 |
| 34               | 6                | 0              | 2.737368                | -0.111778 | -2.760882 |
| 35               | 6                | 0              | 1.129747                | -1.090261 | -4.274758 |
| 36               | 6                | 0              | 3.774103                | -0.743008 | -3.444000 |
| 37               | 1                | 0              | 2.956524                | 0.515259  | -1.894786 |

|    |   |   |           |           |           |
|----|---|---|-----------|-----------|-----------|
| 38 | 6 | 0 | 2.169600  | -1.727886 | -4.959854 |
| 39 | 1 | 0 | 0.102744  | -1.238140 | -4.603253 |
| 40 | 6 | 0 | 3.492101  | -1.555196 | -4.549699 |
| 41 | 1 | 0 | 4.801465  | -0.609268 | -3.109462 |
| 42 | 1 | 0 | 1.941839  | -2.359401 | -5.815306 |
| 43 | 1 | 0 | 4.299360  | -2.049557 | -5.084662 |
| 44 | 6 | 0 | 0.785793  | -1.629456 | 3.529639  |
| 45 | 6 | 0 | 2.077416  | -1.096196 | 3.394613  |
| 46 | 6 | 0 | 0.575006  | -2.644919 | 4.471973  |
| 47 | 6 | 0 | 3.126372  | -1.556301 | 4.190184  |
| 48 | 1 | 0 | 2.257079  | -0.317563 | 2.654127  |
| 49 | 6 | 0 | 1.626445  | -3.112801 | 5.262081  |
| 50 | 1 | 0 | -0.415640 | -3.079259 | 4.595718  |
| 51 | 6 | 0 | 2.903920  | -2.566999 | 5.128070  |
| 52 | 1 | 0 | 4.118608  | -1.125355 | 4.072726  |
| 53 | 1 | 0 | 1.444955  | -3.908116 | 5.981950  |
| 54 | 1 | 0 | 3.721228  | -2.929987 | 5.747528  |
| 55 | 6 | 0 | -1.203999 | 0.407594  | 3.587451  |
| 56 | 6 | 0 | -0.306725 | 1.283572  | 4.213498  |
| 57 | 6 | 0 | -2.579946 | 0.635998  | 3.715738  |
| 58 | 6 | 0 | -0.777150 | 2.352780  | 4.973276  |
| 59 | 1 | 0 | 0.767326  | 1.127979  | 4.111990  |
| 60 | 6 | 0 | -3.049527 | 1.707456  | 4.474418  |
| 61 | 1 | 0 | -3.290388 | -0.011912 | 3.207044  |
| 62 | 6 | 0 | -2.150899 | 2.566642  | 5.107811  |
| 63 | 1 | 0 | -0.069241 | 3.021403  | 5.457557  |
| 64 | 1 | 0 | -4.120387 | 1.875310  | 4.561341  |
| 65 | 1 | 0 | -2.517881 | 3.403011  | 5.698384  |
| 66 | 6 | 0 | 4.209143  | -2.438124 | -0.090274 |
| 67 | 6 | 0 | 4.663397  | -1.176209 | 0.315716  |
| 68 | 6 | 0 | 5.127673  | -3.413146 | -0.504724 |
| 69 | 6 | 0 | 6.028937  | -0.892858 | 0.307964  |
| 70 | 1 | 0 | 3.937858  | -0.420614 | 0.622681  |
| 71 | 6 | 0 | 6.491029  | -3.123569 | -0.515932 |
| 72 | 1 | 0 | 4.779356  | -4.395865 | -0.821878 |
| 73 | 6 | 0 | 6.941413  | -1.863951 | -0.109468 |
| 74 | 1 | 0 | 6.378819  | 0.087151  | 0.621608  |
| 75 | 1 | 0 | 7.202186  | -3.878172 | -0.841972 |
| 76 | 1 | 0 | 8.005245  | -1.640118 | -0.120424 |
| 77 | 6 | 0 | 2.030094  | -4.024888 | 1.101962  |
| 78 | 6 | 0 | 2.968714  | -4.559608 | 1.990377  |
| 79 | 6 | 0 | 0.701278  | -4.480514 | 1.112661  |
| 80 | 6 | 0 | 2.584433  | -5.568274 | 2.875633  |
| 81 | 1 | 0 | 3.993029  | -4.187448 | 1.995532  |

|                                              |   |   |              |           |          |
|----------------------------------------------|---|---|--------------|-----------|----------|
| 82                                           | 6 | 0 | 0.329884     | -5.490133 | 1.997697 |
| 83                                           | 1 | 0 | -0.037289    | -4.027012 | 0.443434 |
| 84                                           | 6 | 0 | 1.270465     | -6.038428 | 2.874867 |
| 85                                           | 1 | 0 | 3.311633     | -5.979854 | 3.571155 |
| 86                                           | 1 | 0 | -0.697710    | -5.846397 | 2.003394 |
| 87                                           | 1 | 0 | 0.976672     | -6.827454 | 3.563324 |
| -----                                        |   |   |              |           |          |
| Sum of electronic and zero-point Energies=   |   |   | -3672.735026 |           |          |
| Sum of electronic and thermal Energies=      |   |   | -3672.686079 |           |          |
| Sum of electronic and thermal Enthalpies=    |   |   | -3672.685135 |           |          |
| Sum of electronic and thermal Free Energies= |   |   | -3672.819528 |           |          |

Reference 40: Gaussian 09, Revision B.01, M. J. Frisch, G. W. Trucks, H. B. Schlegel, G. E. Scuseria, M. A. Robb, J. R. Cheeseman, G. Scalmani, V. Barone, B. Mennucci, G. A. Petersson, H. Nakatsuji, M. Caricato, X. Li, H. P. Hratchian, A. F. Izmaylov, J. Bloino, G. Zheng, J. L. Sonnenberg, M. Hada, M. Ehara, K. Toyota, R. Fukuda, J. Hasegawa, M. Ishida, T. Nakajima, Y. Honda, O. Kitao, H. Nakai, T. Vreven, J. A. Montgomery, Jr., J. E. Peralta, F. Ogliaro, M. Bearpark, J. J. Heyd, E. Brothers, K. N. Kudin, V. N. Staroverov, T. Keith, R. Kobayashi, J. Normand, K. Raghavachari, A. Rendell, J. C. Burant, S. S. Iyengar, J. Tomasi, M. Cossi, N. Rega, J. M. Millam, M. Klene, J. E. Knox, J. B. Cross, V. Bakken, C. Adamo, J. Jaramillo, R. Gomperts, R. E. Stratmann, O. Yazyev, A. J. Austin, R. Cammi, C. Pomelli, J. W. Ochterski, R. L. Martin, K. Morokuma, V. G. Zakrzewski, G. A. Voth, P. Salvador, J. J. Dannenberg, S. Dapprich, A. D. Daniels, O. Farkas, J. B. Foresman, J. V. Ortiz, J. Cioslowski, and D. J. Fox, Gaussian, Inc., Wallingford CT, 2010.
